# Supplementary material for: Catalyst free C–N bond formation by the reaction of amines with diimides: bulky guanidines
Source: Royal Society of Chemistry journal article supplement (doi:10.1039/c5nj01612f), 2015-01-01
Supplement: c5nj01612f1.pdf [file c5nj01612f1.pdf]

## Supporting Information

### **Catalyst free C–N bond formation by the reaction of amines with diimides activation: Bulky guanidines**

Ashim Baishya,<sup>a</sup> Thota Peddarao,<sup>a</sup> Milan Kr. Barman,<sup>a</sup> and Sharanappa Nembenna\*<sup>a</sup>

*<sup>a</sup>School of Chemical Sciences, National Institute of Science Education and Research (NISER)  
Bhubaneswar, India 751005*

#### **Corresponding Author: Sharanappa Nembenna**

Fax: +91-674-2302436; Tel.: +91-674-2304126

Email: [snembenna@niser.ac.in](mailto:snembenna@niser.ac.in)

### **Contents**

- 1) Table S1. Addition of amines to arylcarbodiimides----- S2–S3
- 2) Copy of <sup>1</sup>H and <sup>13</sup>C{<sup>1</sup>H} NMR spectra of compounds-(1a - 28a) ----- S4 –S31
- 3) Table S2. Crystal data and structural refinement of 1a, 22a, & 27a ----- S32
- 4) Table S3. Selected bond lengths and bond angles----- S33

**Table S1. Addition of amines to bulky aromatic carbodiimides:**

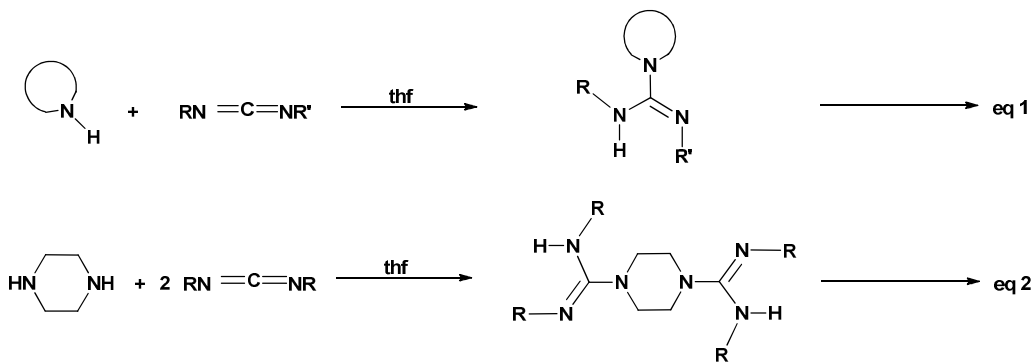

| Entry | amines | R, R'                                                           | Temp. (°C)/ Time (h) | Product    | Yield <sup>a</sup> % |
|-------|--------|-----------------------------------------------------------------|----------------------|------------|----------------------|
| 1     |        | 2,6-Me <sub>2</sub> C <sub>6</sub> H <sub>3</sub>               | r.t. / 1             | <b>1a</b>  | 99                   |
|       |        | 2,4,6-Me <sub>3</sub> C <sub>6</sub> H <sub>2</sub>             | r.t. / 1.33          | <b>2a</b>  | 86                   |
|       |        | 2,6-Et <sub>2</sub> C <sub>6</sub> H <sub>3</sub>               | r.t. / 1.5           | <b>3a</b>  | 86                   |
|       |        | 2,6- <sup>i</sup> Pr <sub>2</sub> C <sub>6</sub> H <sub>3</sub> | r.t./ 2              | <b>4a</b>  | 99                   |
|       |        | 4- <sup>i</sup> PrC <sub>6</sub> H <sub>4</sub>                 | r.t. / 1.16          | <b>5a</b>  | 84                   |
|       |        | 4- <sup>t</sup> ButC <sub>6</sub> H <sub>4</sub>                | r.t./ 1              | <b>6a</b>  | 96                   |
| 2     |        | 2,6-Me <sub>2</sub> C <sub>6</sub> H <sub>3</sub>               | r.t./ 2              | <b>7a</b>  | 97                   |
|       |        | 2,4,6-Me <sub>3</sub> C <sub>6</sub> H <sub>2</sub>             | r.t./ 2              | <b>8a</b>  | 99                   |
|       |        | 2,6-Et <sub>2</sub> C <sub>6</sub> H <sub>3</sub>               | r.t./ 2              | <b>9a</b>  | 99                   |
|       |        | 2,6- <sup>i</sup> Pr <sub>2</sub> C <sub>6</sub> H <sub>3</sub> | r.t./ 2              | <b>10a</b> | 99                   |
|       |        | 4- <sup>i</sup> PrC <sub>6</sub> H <sub>4</sub>                 | r.t./ 1              | <b>11a</b> | 77                   |
|       |        | 4- <sup>t</sup> ButC <sub>6</sub> H <sub>4</sub>                | r.t./ 1              | <b>12a</b> | 89                   |
| 3     |        | 2,6-Me <sub>2</sub> C <sub>6</sub> H <sub>3</sub>               | r.t./ 1.83           | <b>13a</b> | 99                   |
|       |        | 2,4,6-Me <sub>3</sub> C <sub>6</sub> H <sub>2</sub>             | r.t. / 2             | <b>14a</b> | 98                   |
|       |        | 2,6-Et <sub>2</sub> C <sub>6</sub> H <sub>3</sub>               | r.t./ 2              | <b>15a</b> | 89                   |
|       |        | 2,6- <sup>i</sup> Pr <sub>2</sub> C <sub>6</sub> H <sub>3</sub> | r.t. / 2             | <b>16a</b> | 99                   |
|       |        | 4- <sup>i</sup> PrC <sub>6</sub> H <sub>4</sub>                 | r.t./ 2              | <b>17a</b> | 99                   |
|       |        | 4- <sup>t</sup> ButC <sub>6</sub> H <sub>4</sub>                | r.t. / 2             | <b>18a</b> | 99                   |
| 4     |        | 2,6-Me <sub>2</sub> C <sub>6</sub> H <sub>3</sub>               | 80 / 24              | <b>19a</b> | 42                   |
|       |        | 2,4,6-Me <sub>3</sub> C <sub>6</sub> H <sub>2</sub>             | 80 / 24              | <b>20a</b> | 37                   |
| 5     |        | 2,4,6-Me <sub>3</sub> C <sub>6</sub> H <sub>2</sub>             | r.t. / 1             | <b>21a</b> | 92                   |
|       |        | 2,6- <sup>i</sup> Pr <sub>2</sub> C <sub>6</sub> H <sub>3</sub> | 60/ 2                | <b>22a</b> | 89                   |

|   |                                                                                   |                                                                                                                                 |           |            |    |
|---|-----------------------------------------------------------------------------------|---------------------------------------------------------------------------------------------------------------------------------|-----------|------------|----|
| 6 | 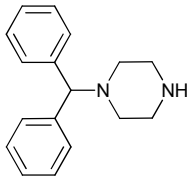 | 2,6-Me <sub>2</sub> C <sub>6</sub> H <sub>3</sub>                                                                               | r.t. / 12 | <b>23a</b> | 86 |
|   |                                                                                   | 2,6-( <sup>t</sup> Pr) <sub>2</sub> C <sub>6</sub> H <sub>3</sub>                                                               | r.t. / 24 | <b>24a</b> | 76 |
| 7 |  | 2,6- <sup>i</sup> Pr <sub>2</sub> C <sub>6</sub> H <sub>3</sub> (R)<br>2,4,6-Me <sub>3</sub> C <sub>6</sub> H <sub>2</sub> (R') | r.t. / 2  | <b>25a</b> | 99 |
| 8 |  | 2,6- <sup>i</sup> Pr <sub>2</sub> C <sub>6</sub> H <sub>3</sub> (R)<br>2,4,6-Me <sub>3</sub> C <sub>6</sub> H <sub>3</sub> (R') | r.t. / 2  | <b>26a</b> | 93 |
| 9 |  | 2,6-Me <sub>2</sub> C <sub>6</sub> H <sub>3</sub>                                                                               | r.t. / 4  | <b>27a</b> | 90 |
|   |                                                                                   | 2,6- <sup>i</sup> Pr <sub>2</sub> C <sub>6</sub> H <sub>3</sub>                                                                 | 80 / 12   | <b>28a</b> | 60 |

<sup>a</sup>Isolated yield

Copy of  $^1\text{H}$  and  $^{13}\text{C}$  NMR Spectra of the products:

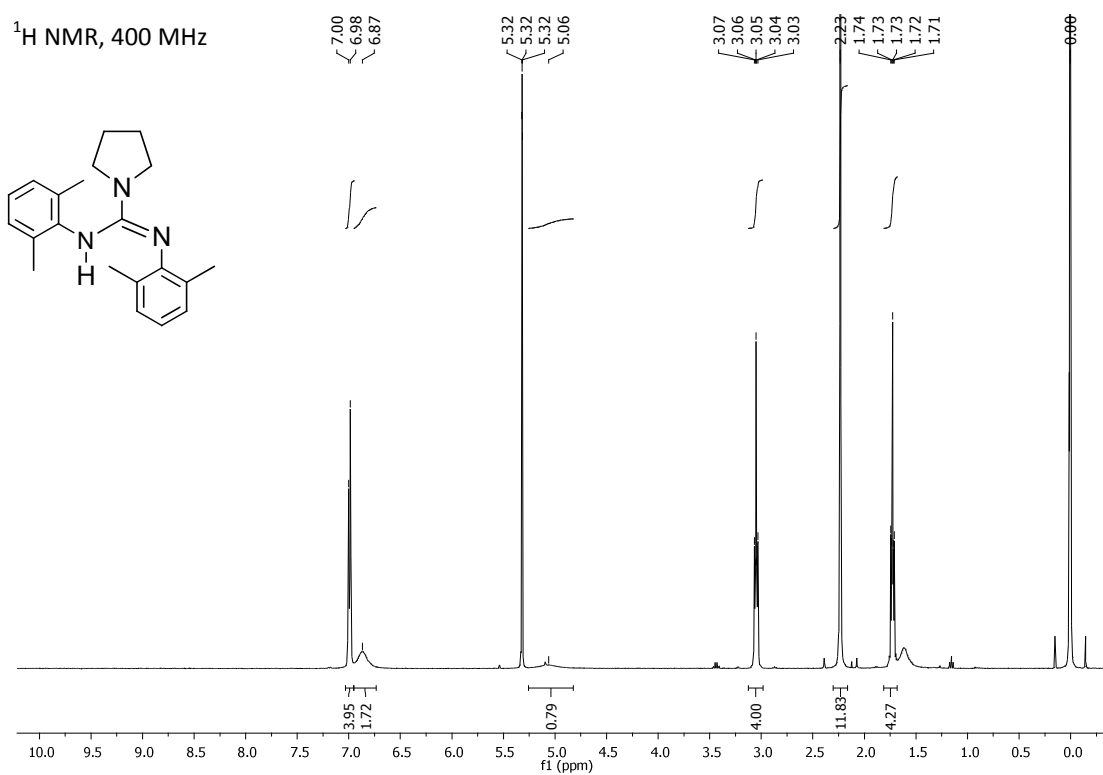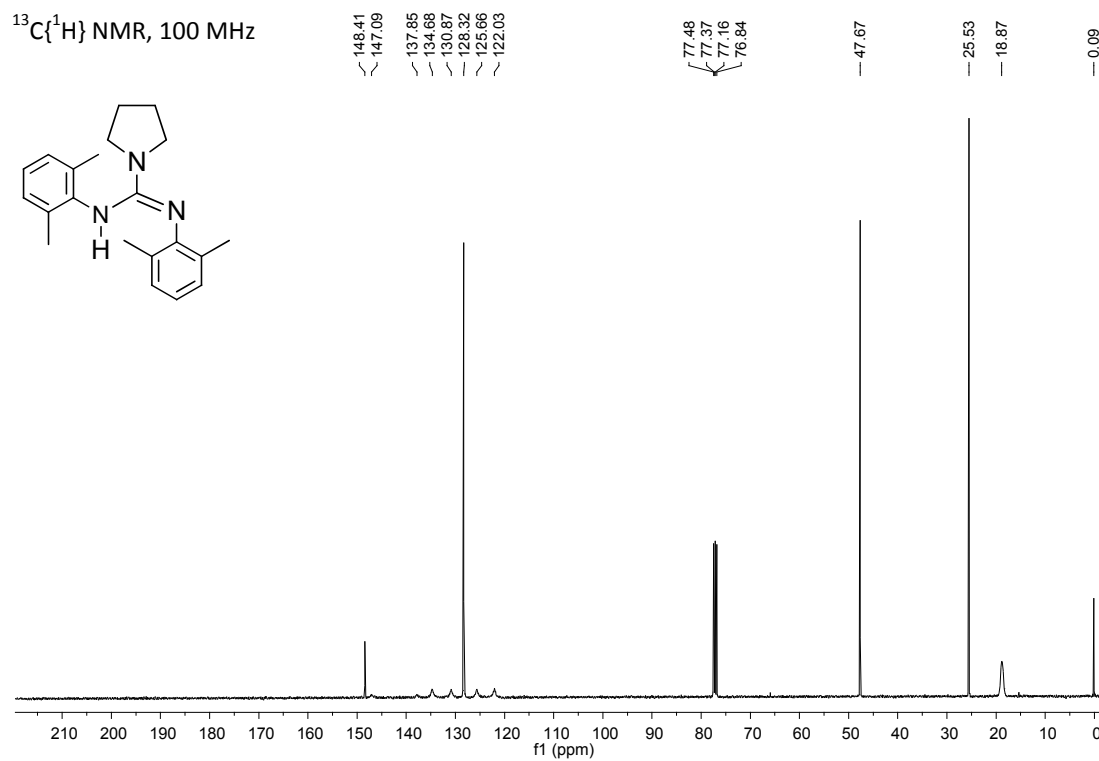

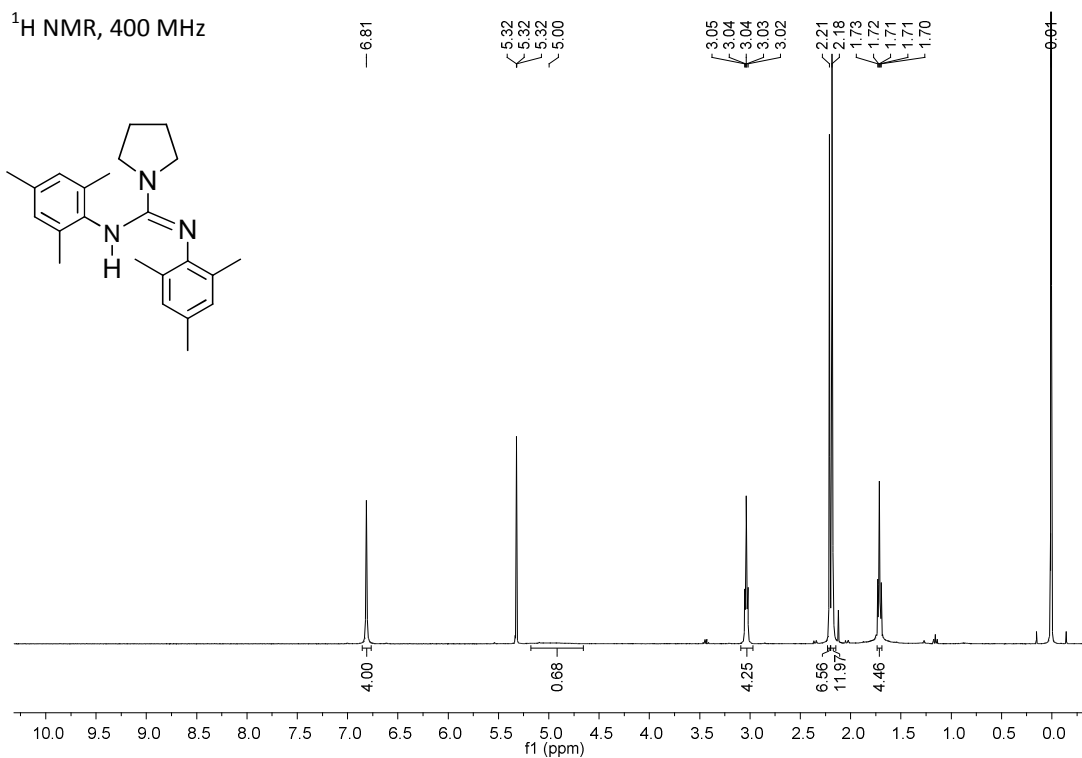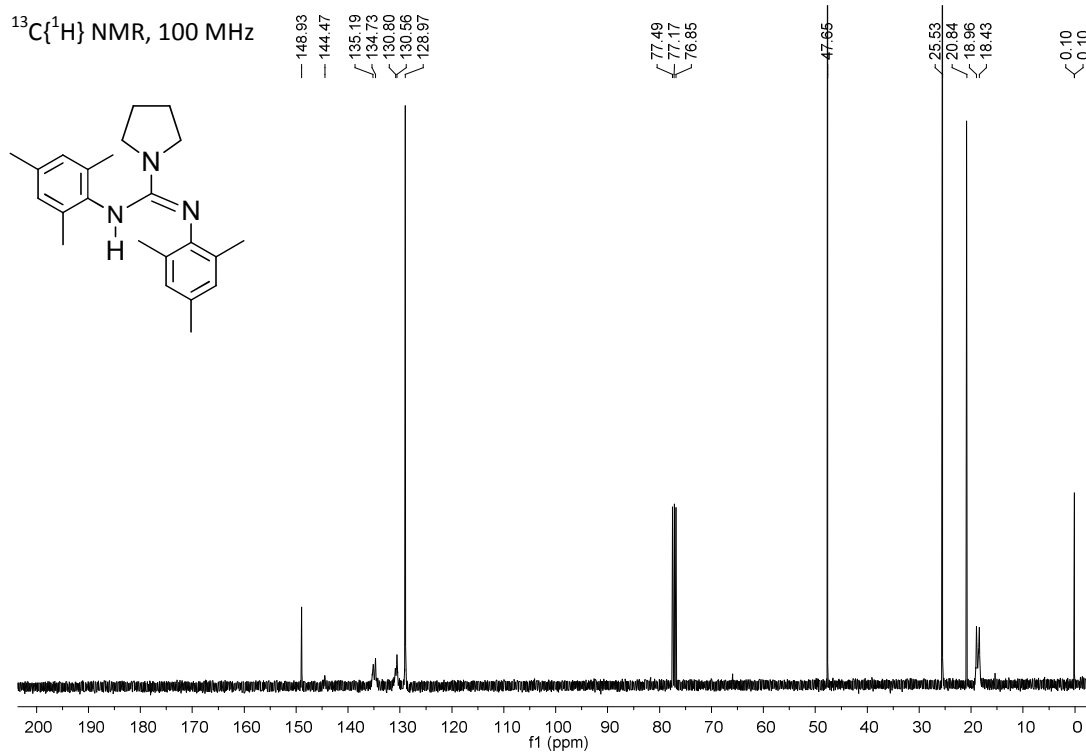

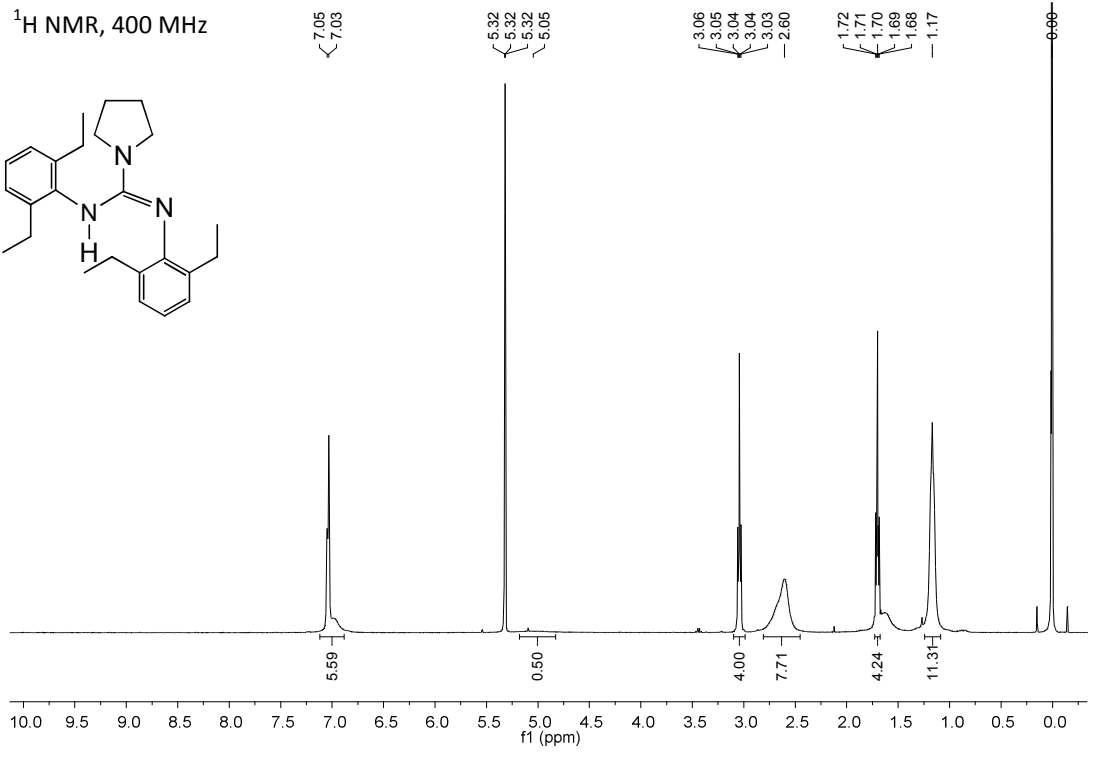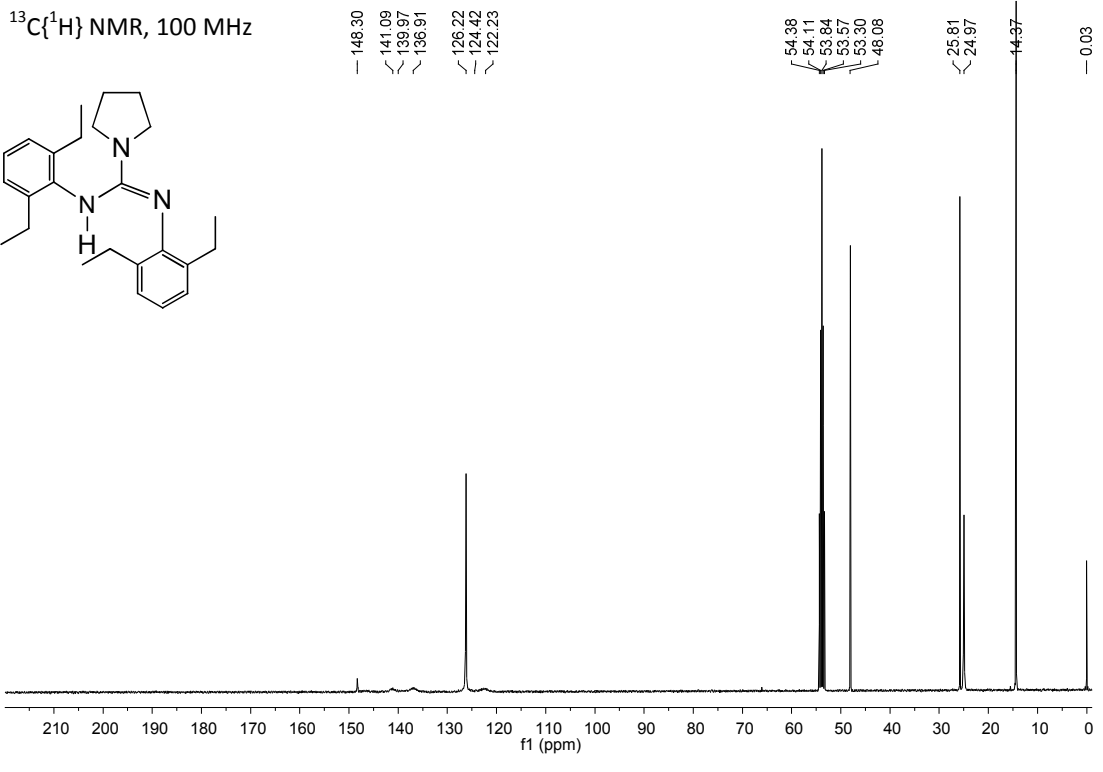

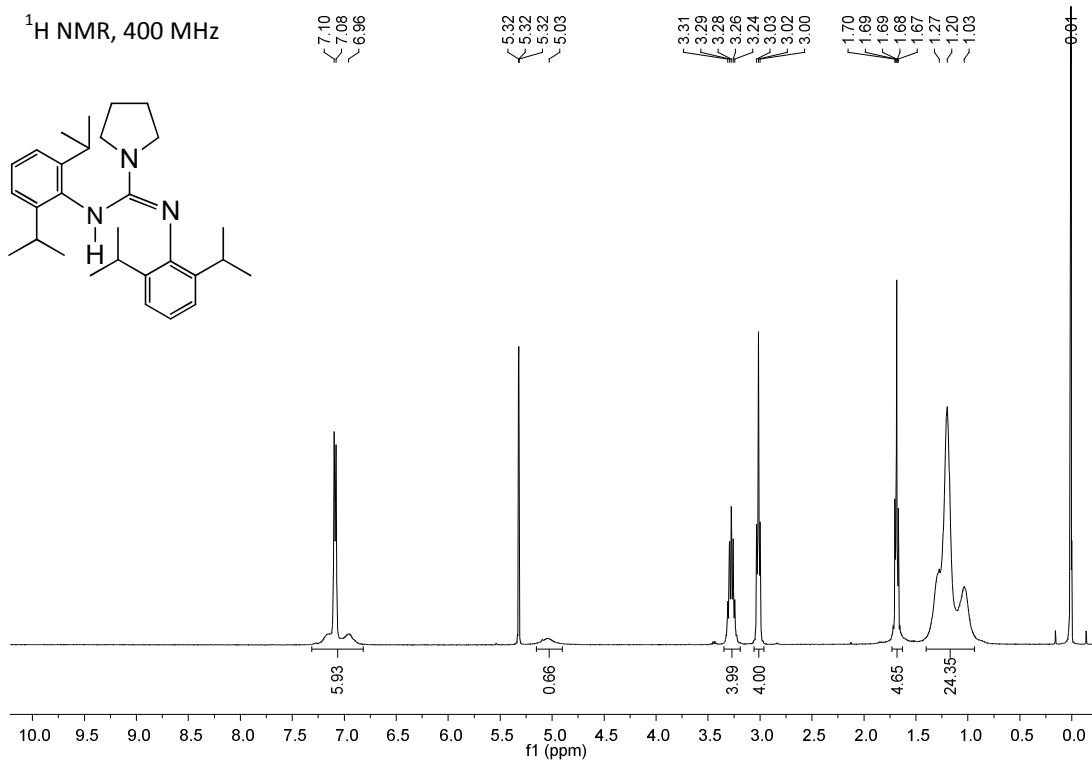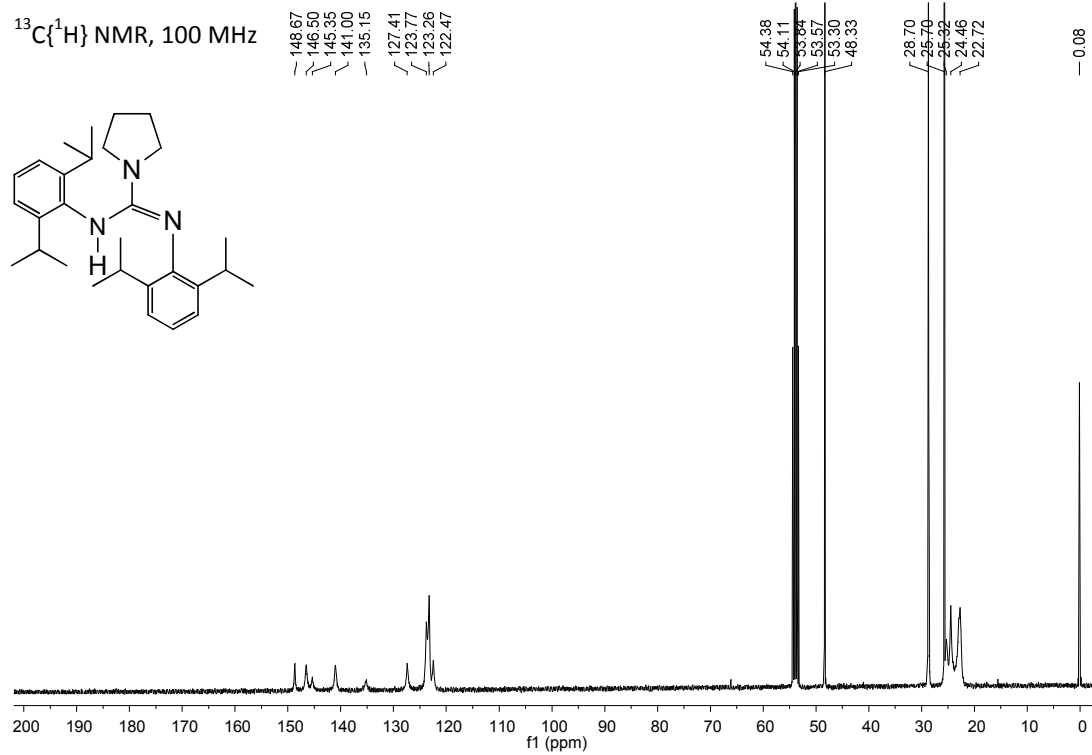

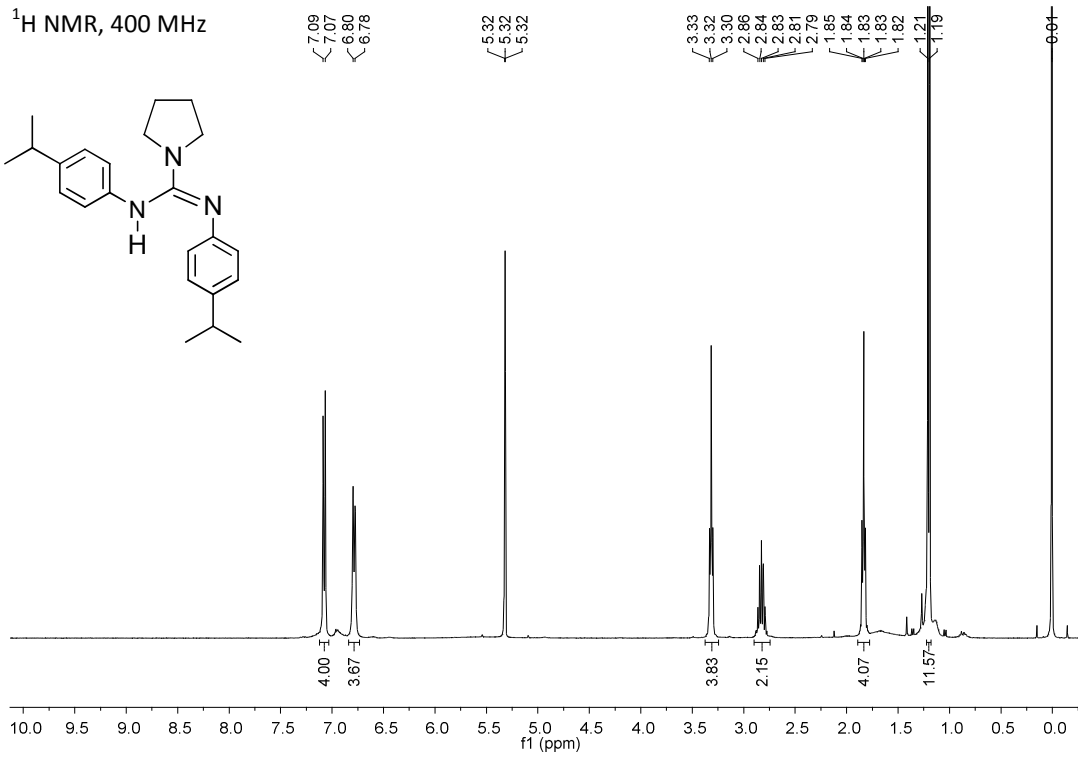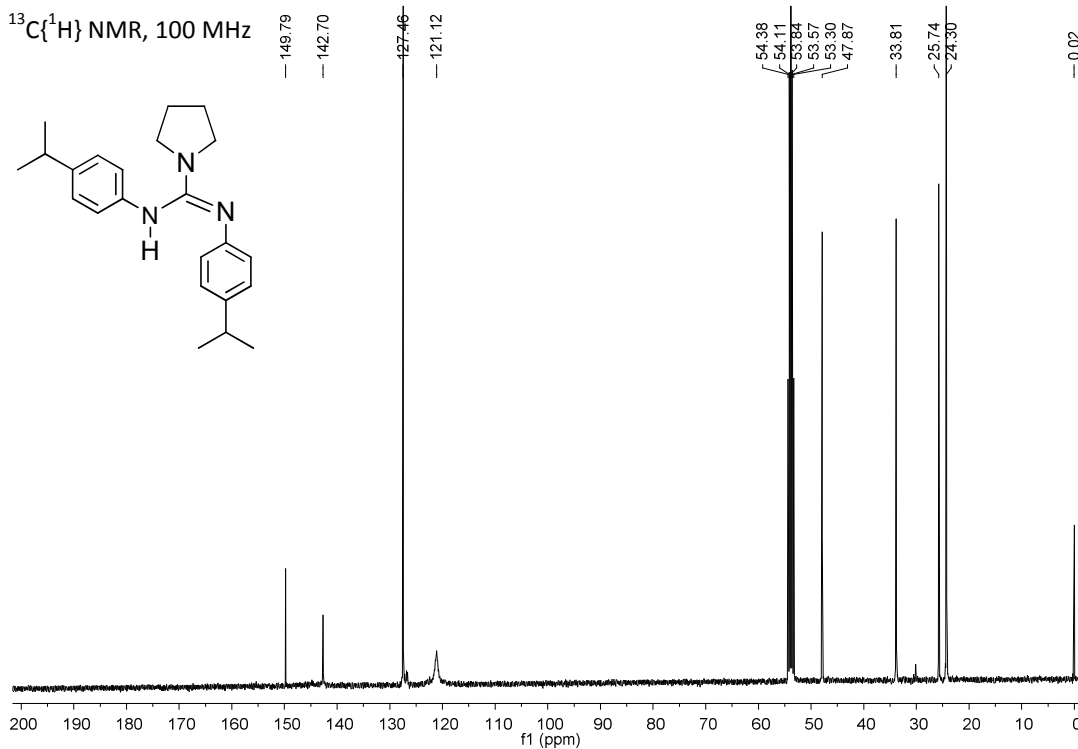



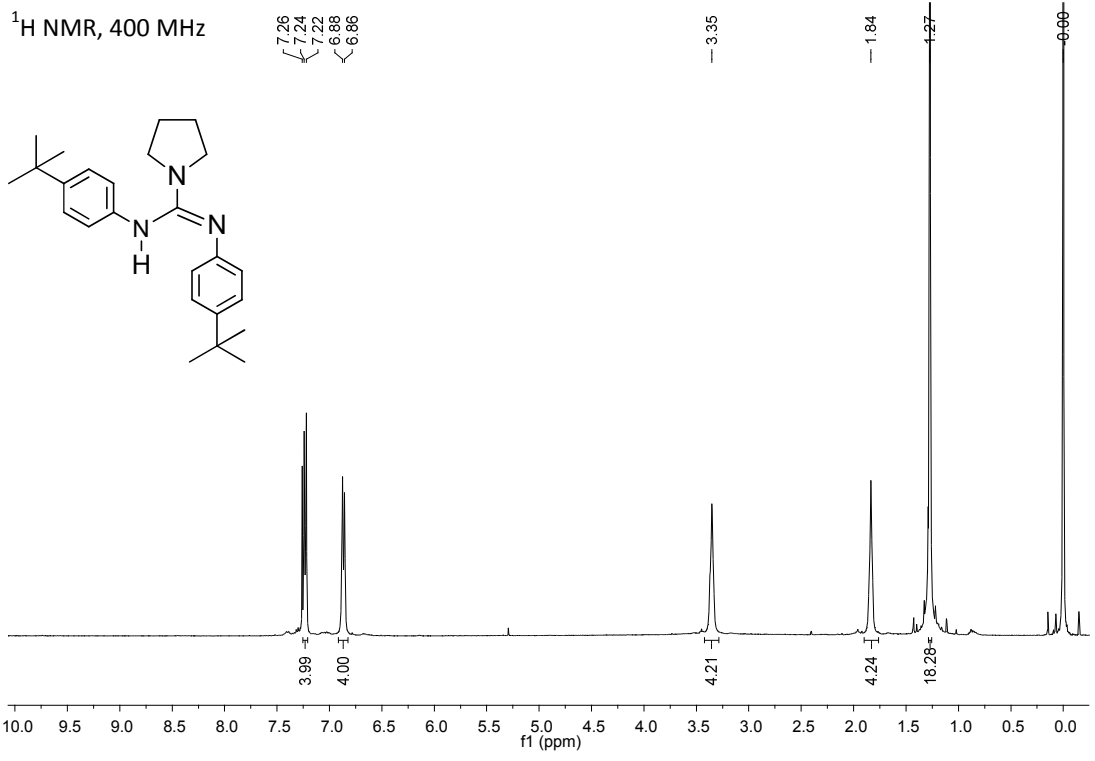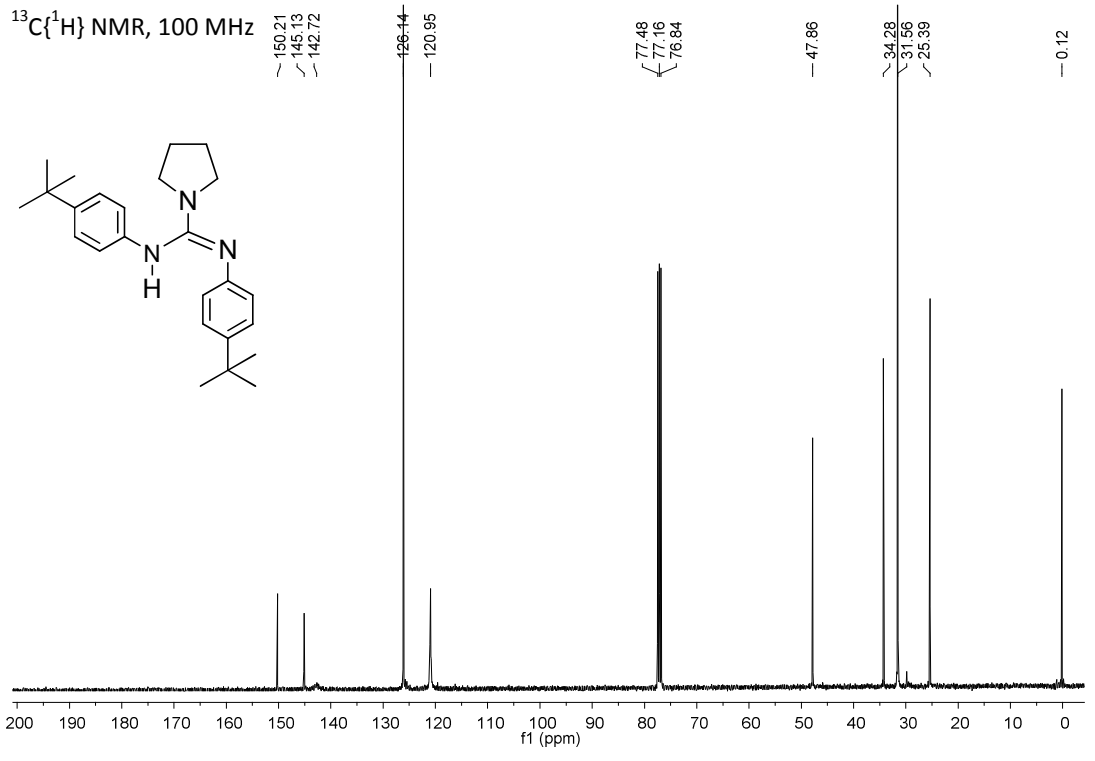

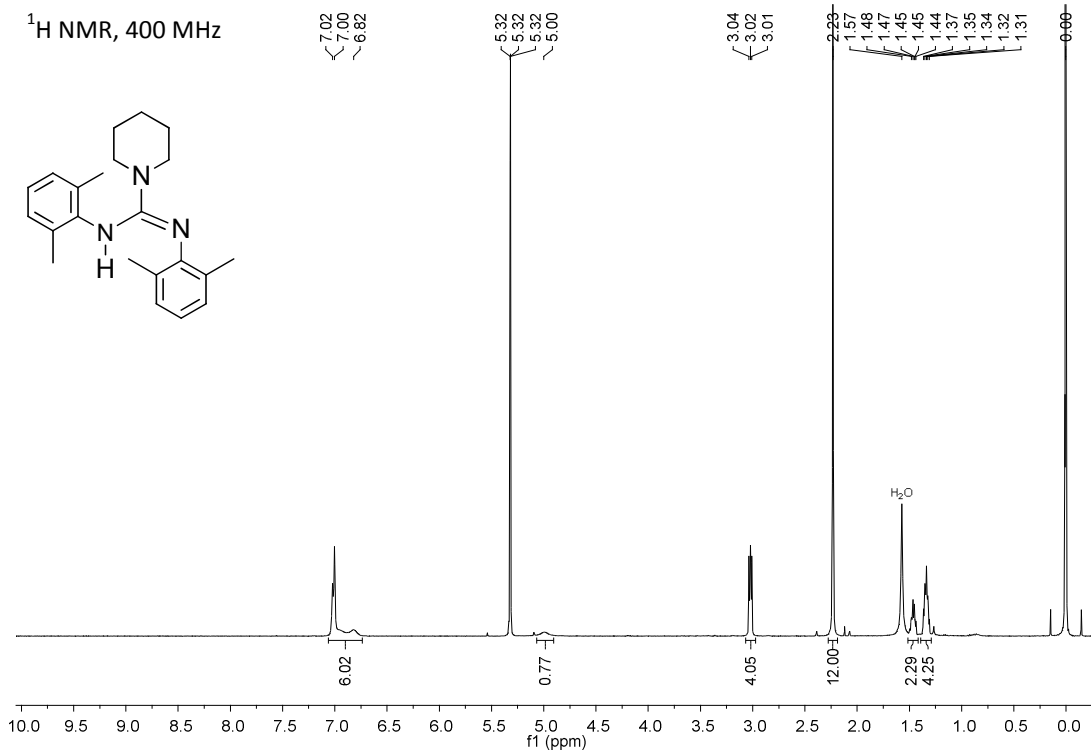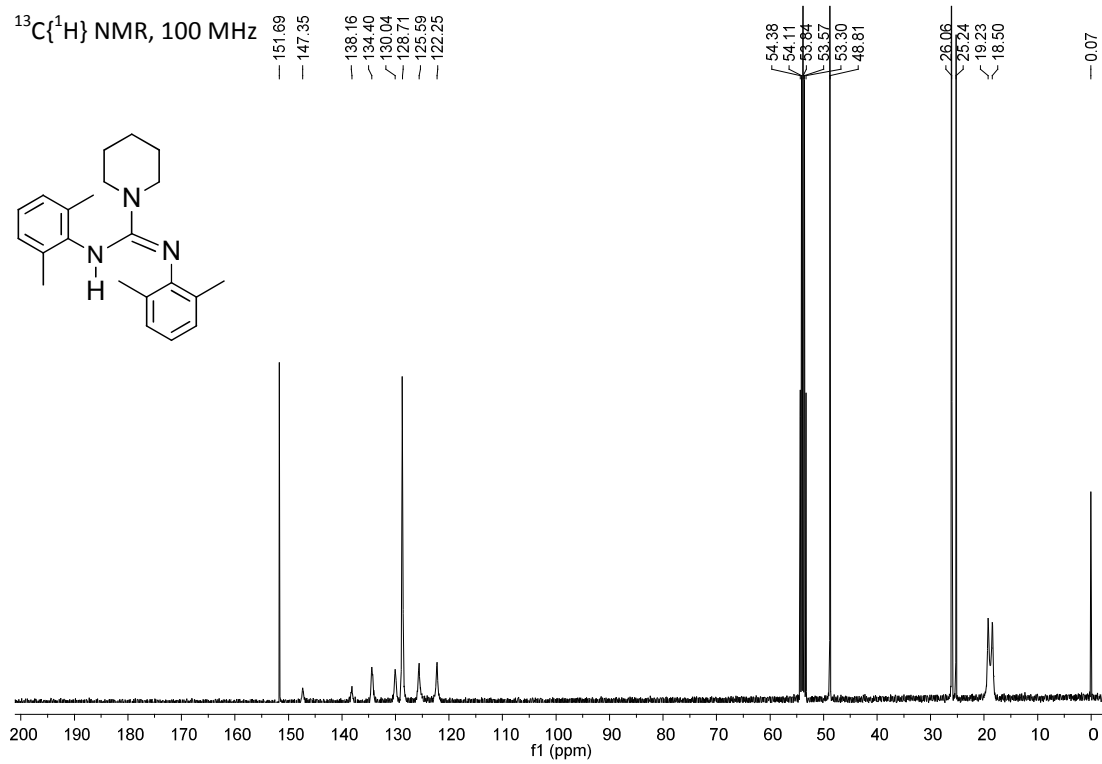

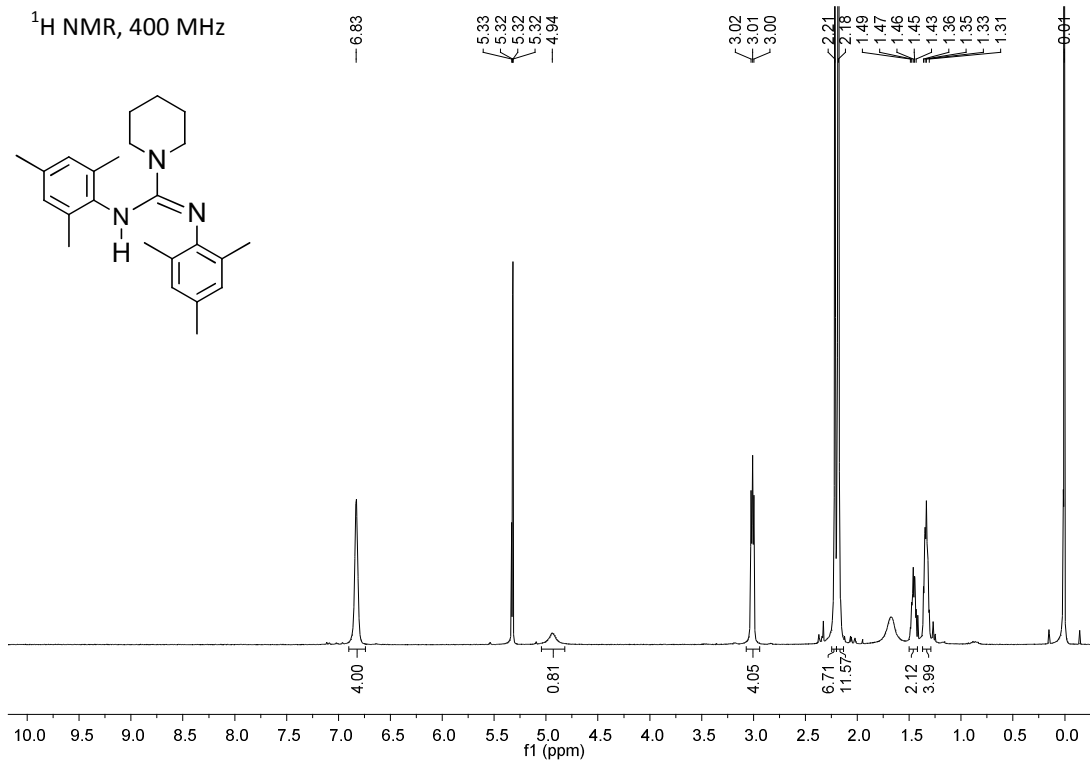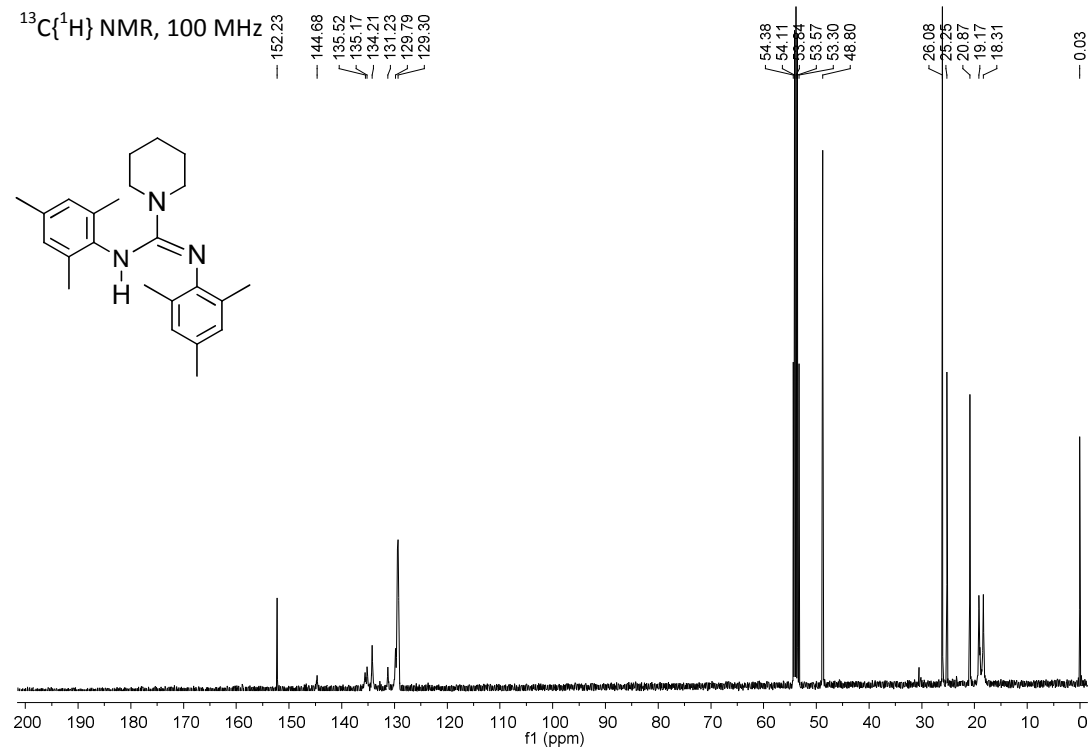

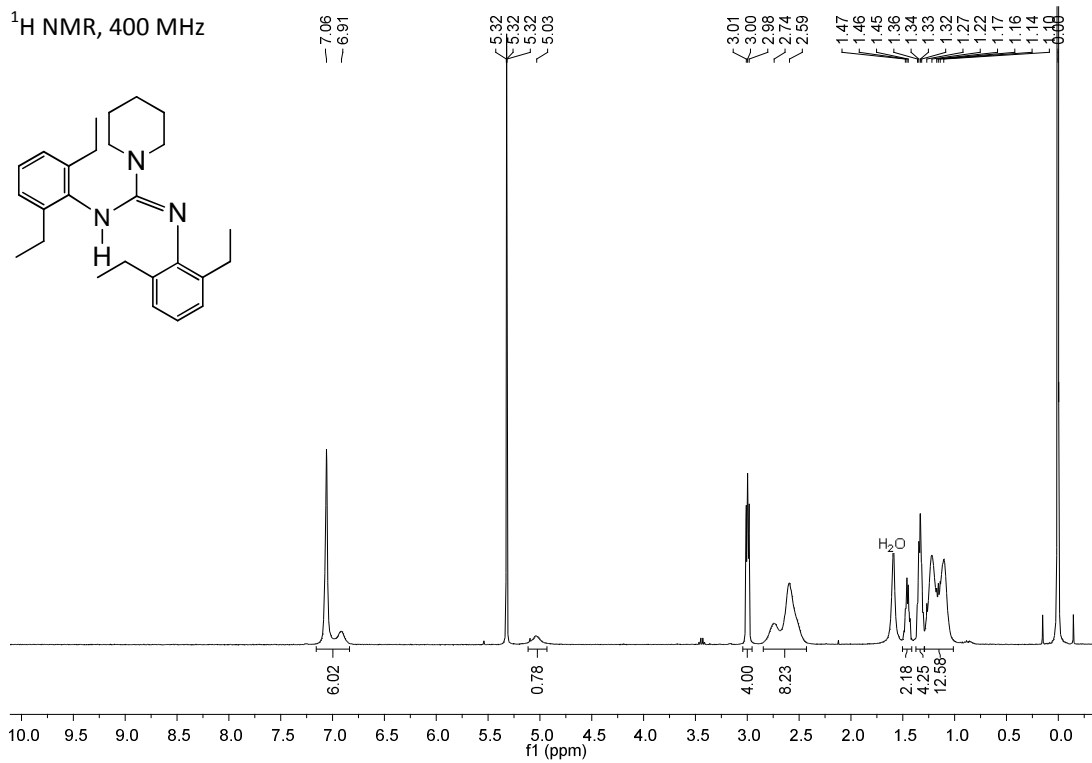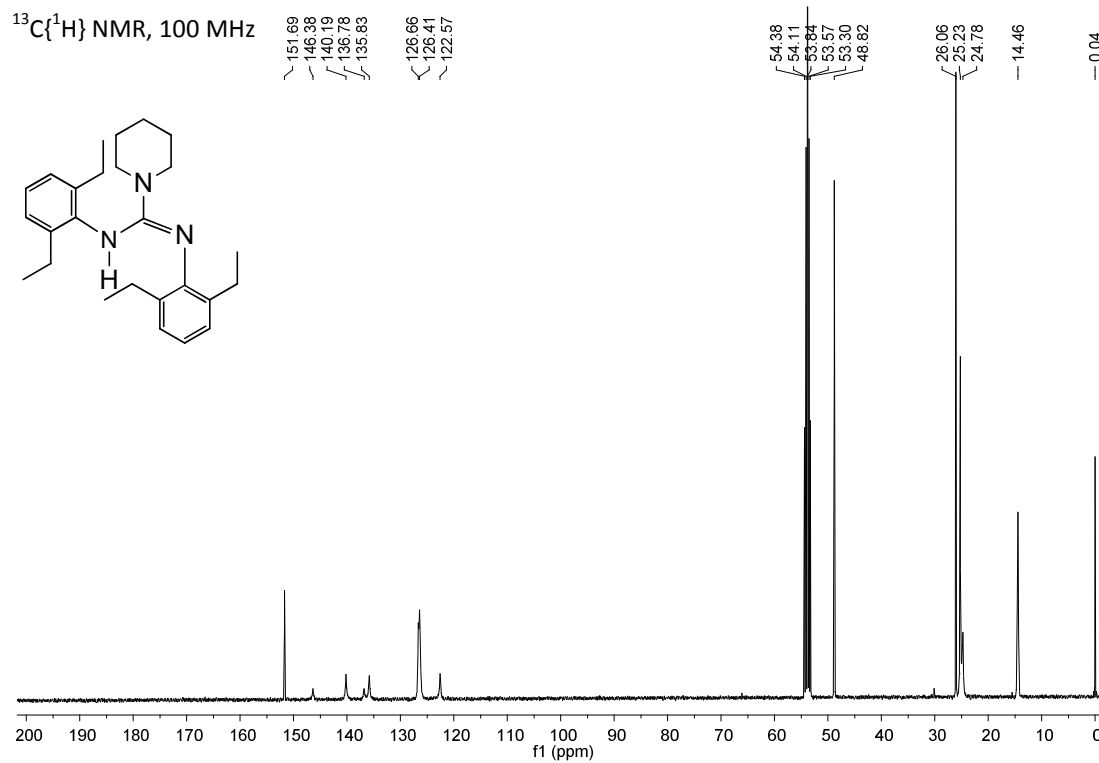

$^1\text{H}$  NMR, 400 MHz

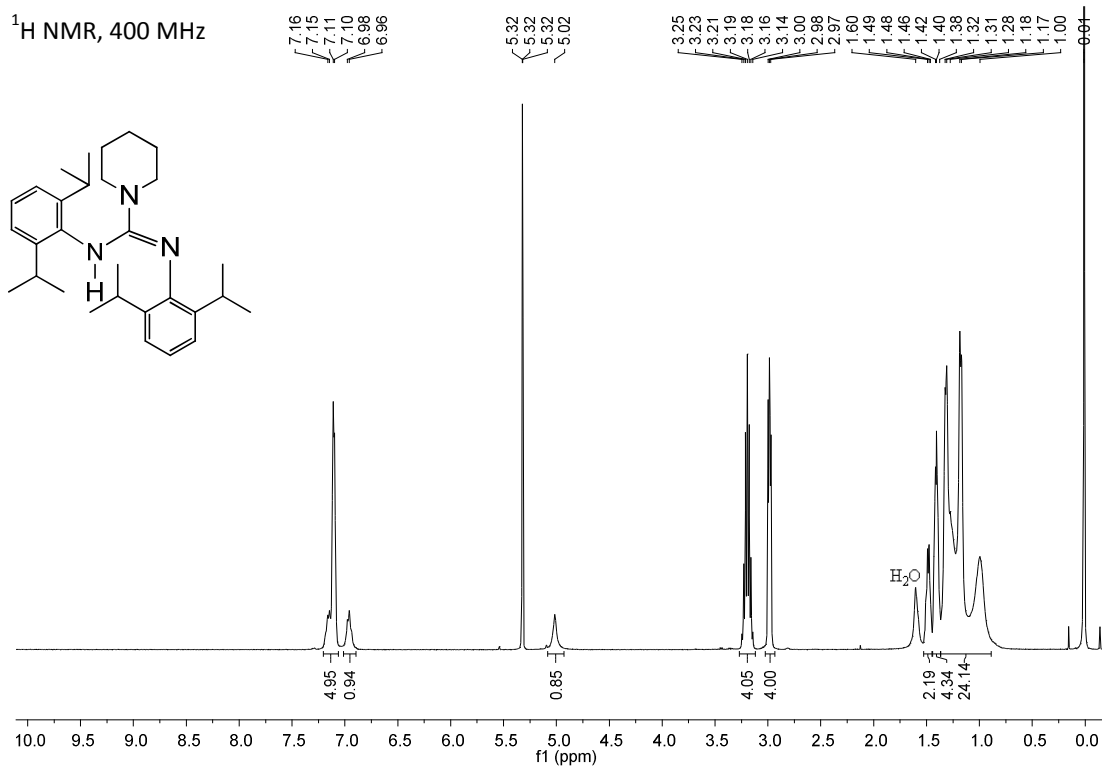

$^{13}\text{C}\{^1\text{H}\}$  NMR, 100 MHz

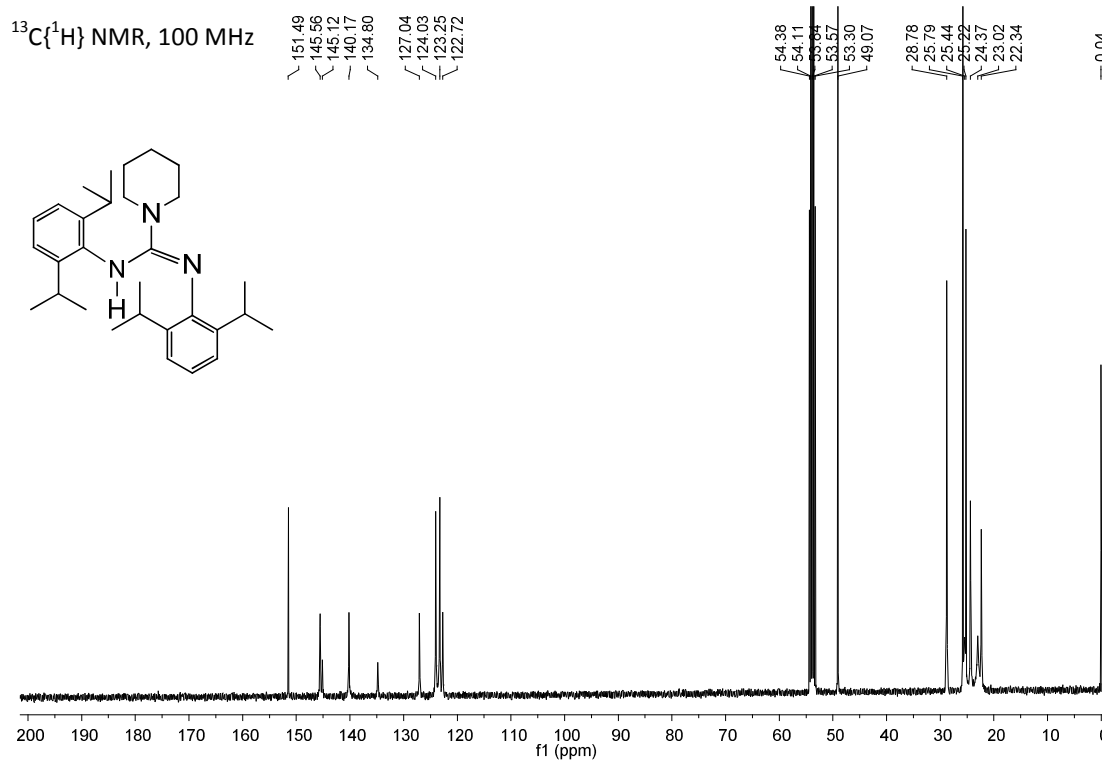

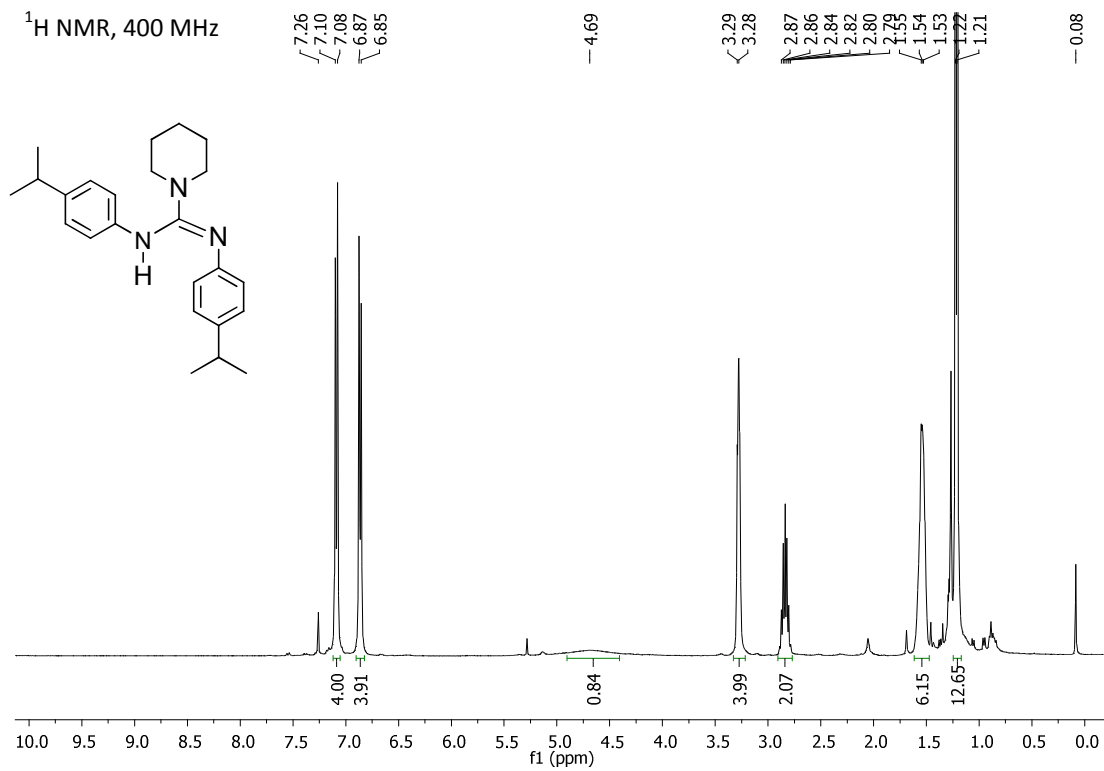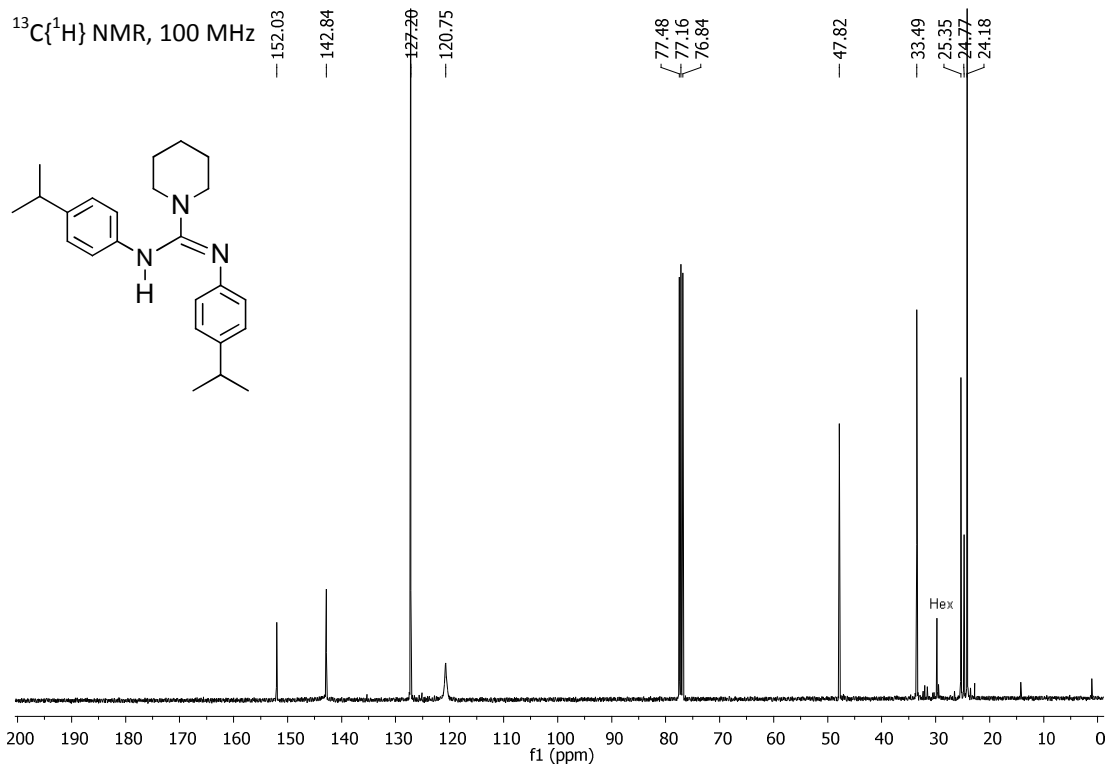

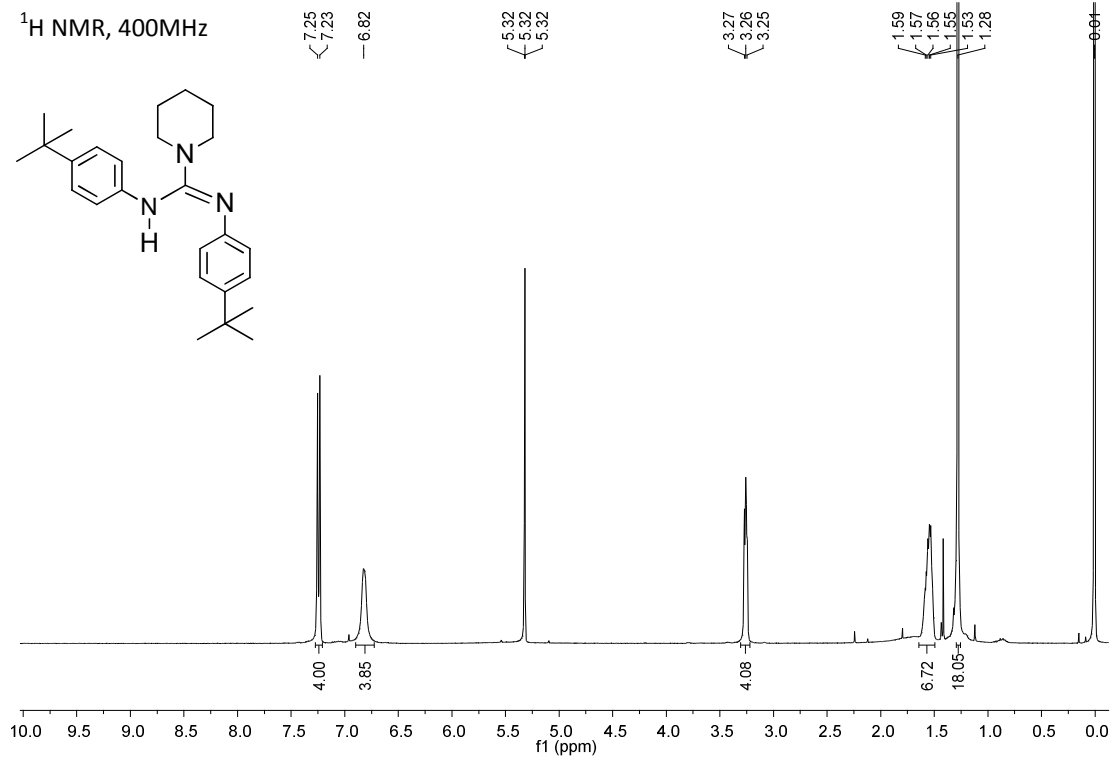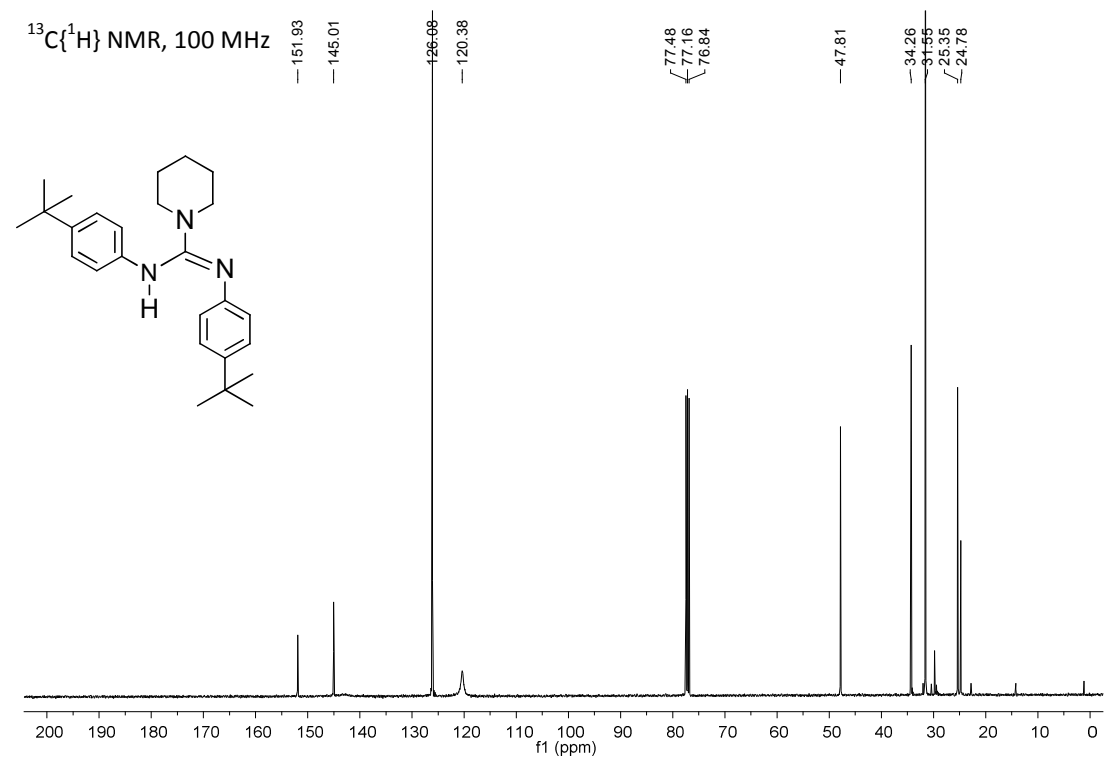

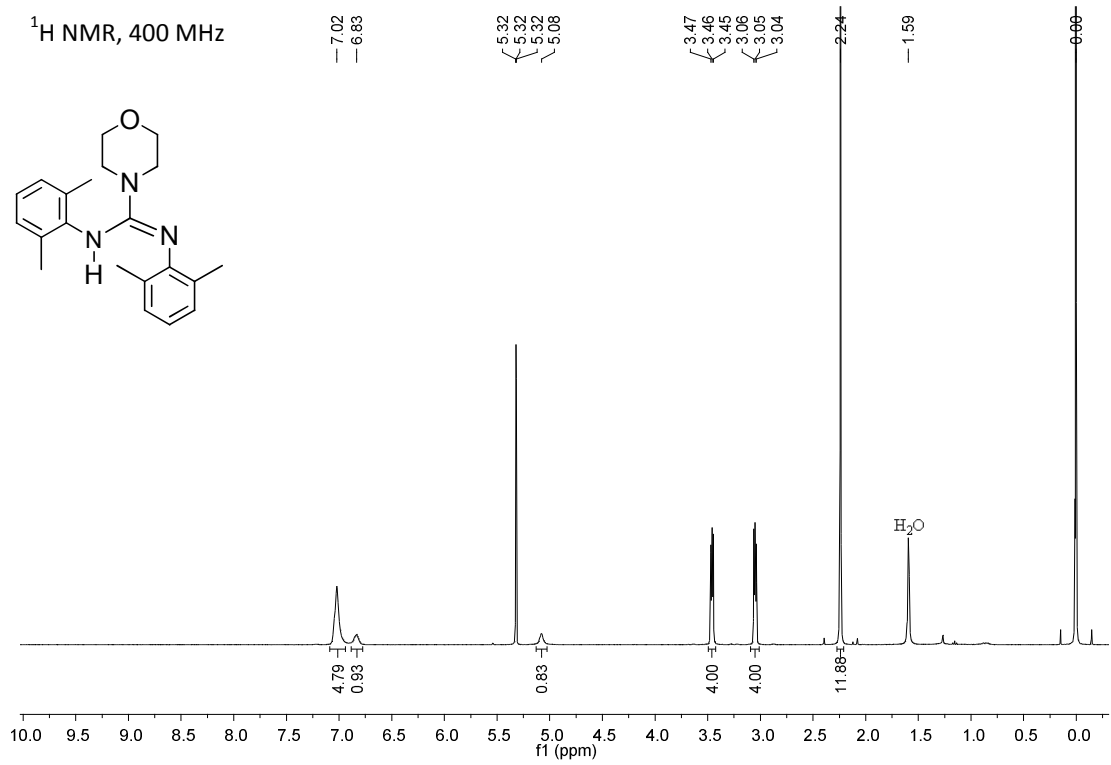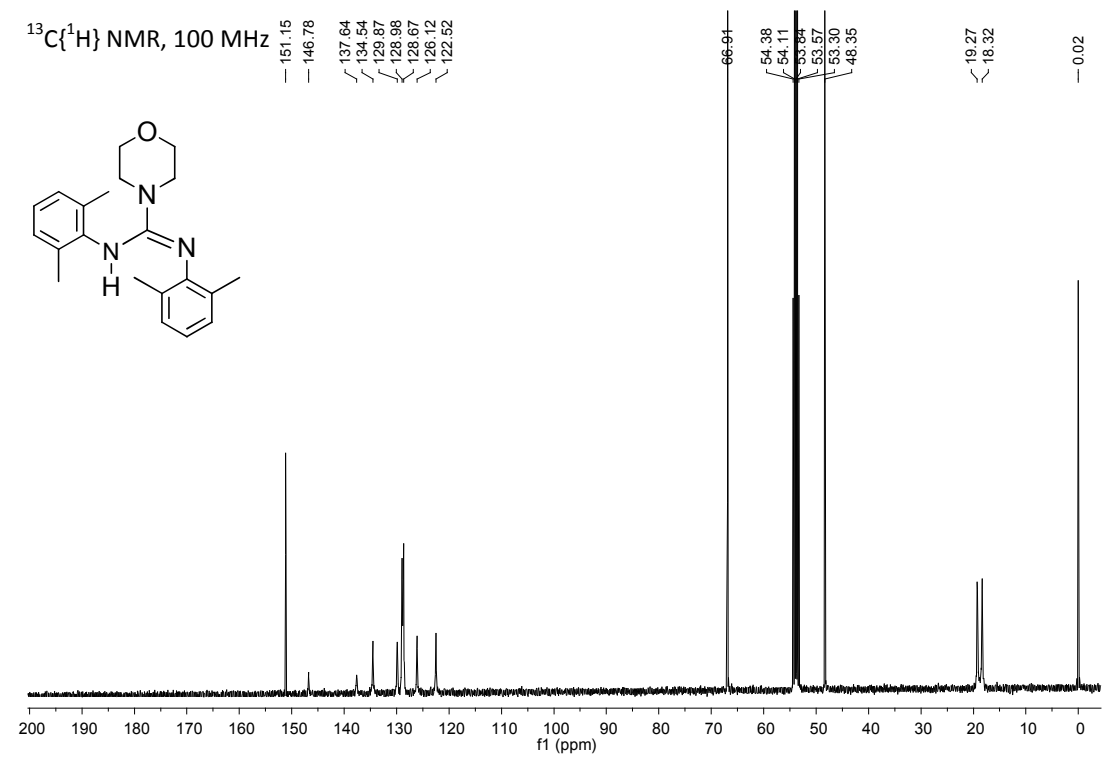



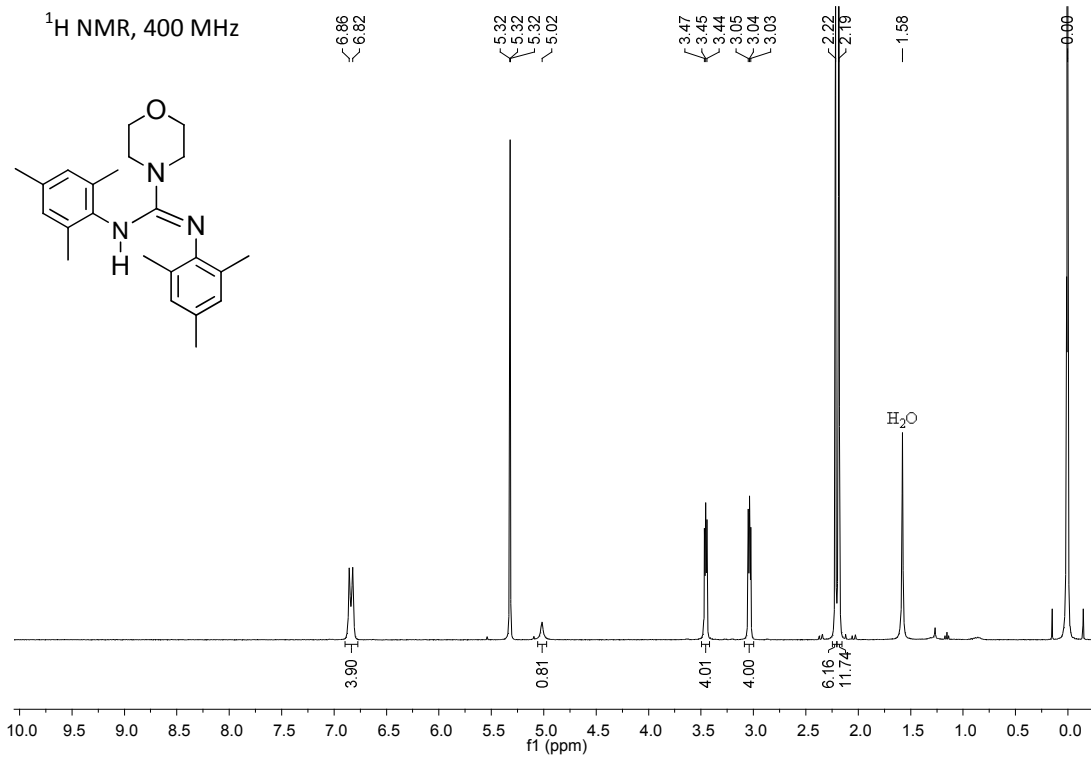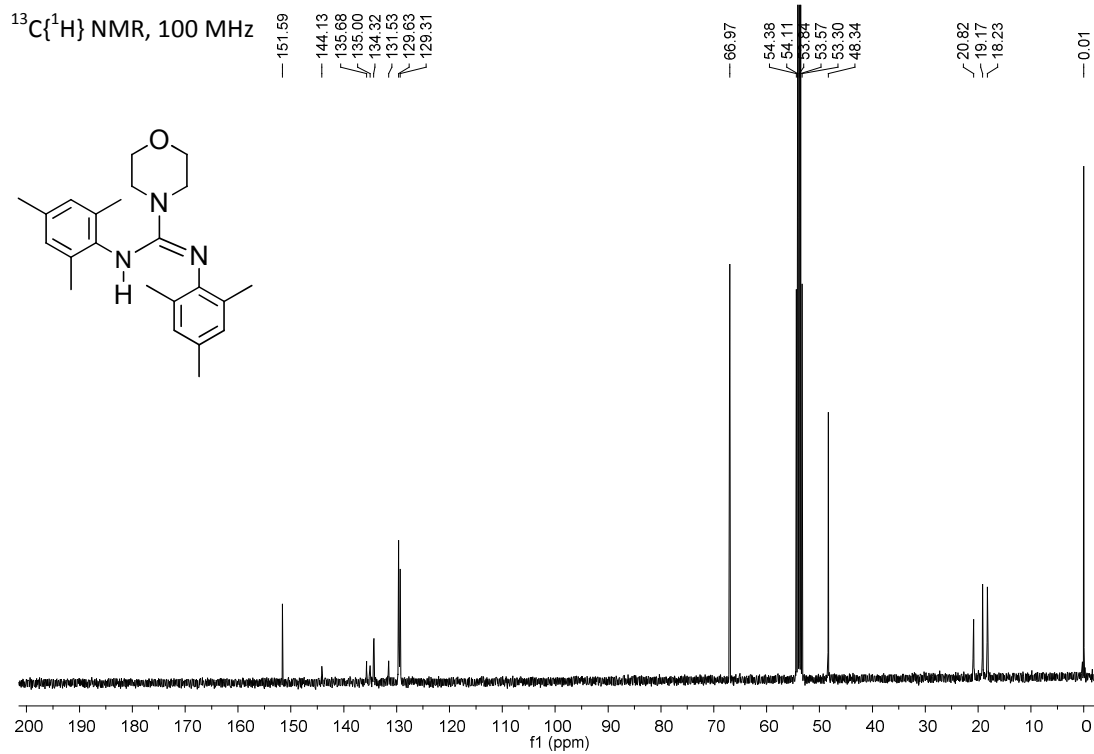

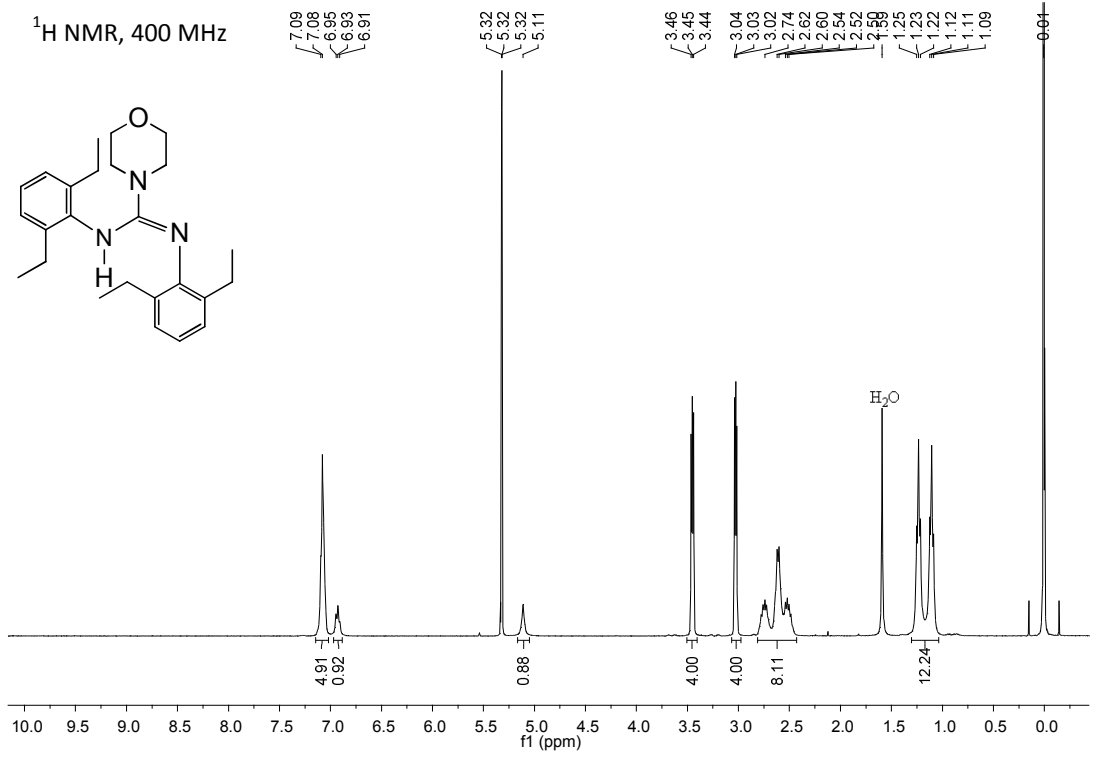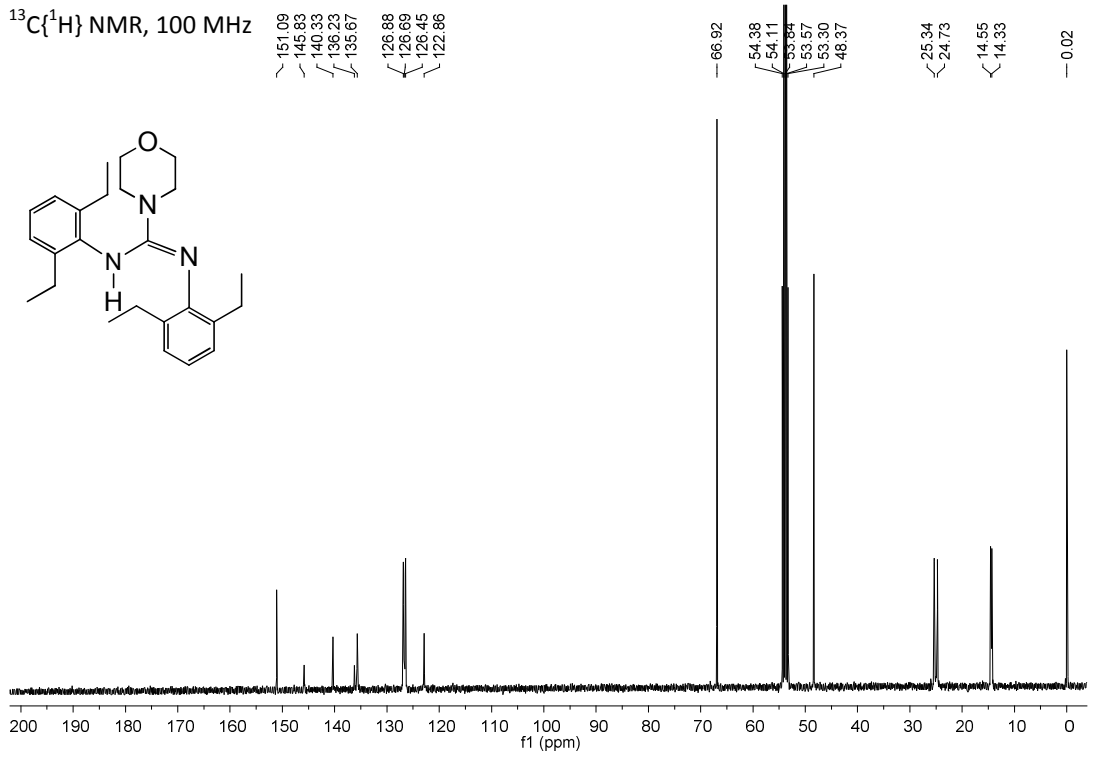

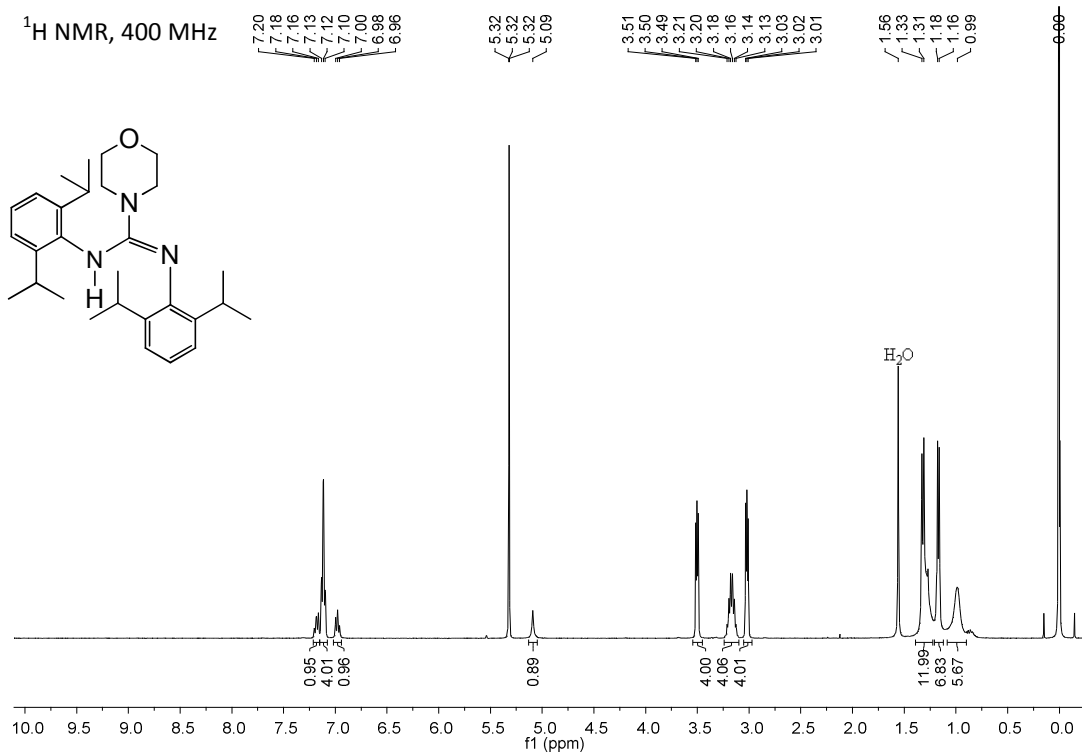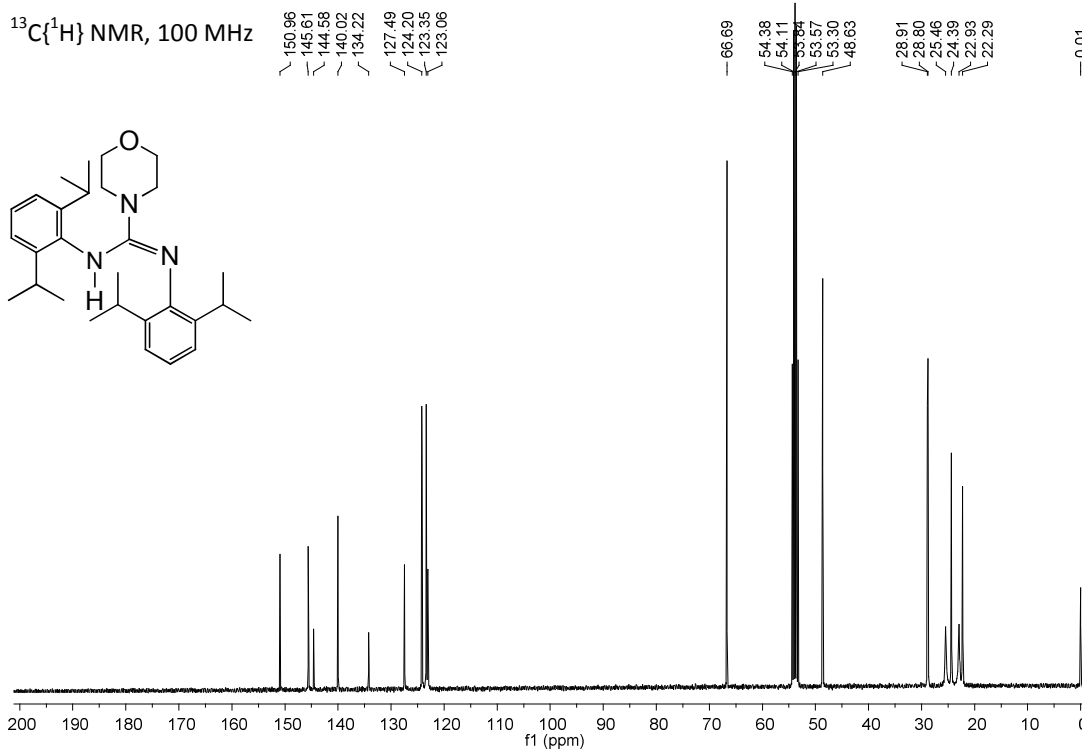

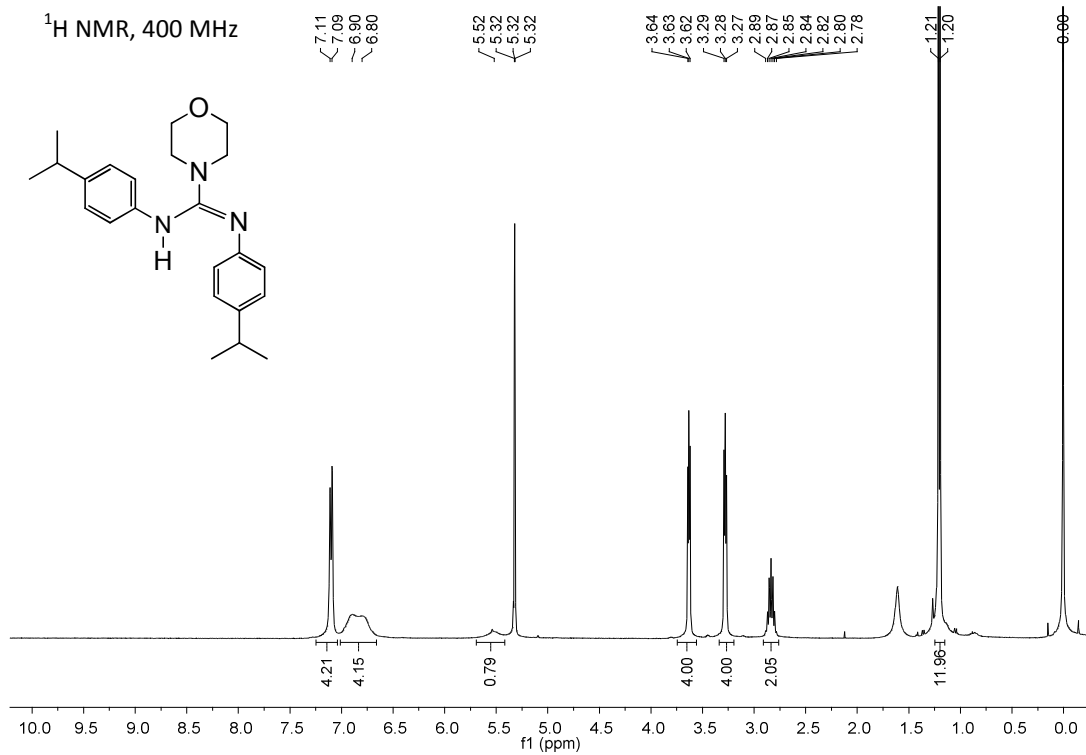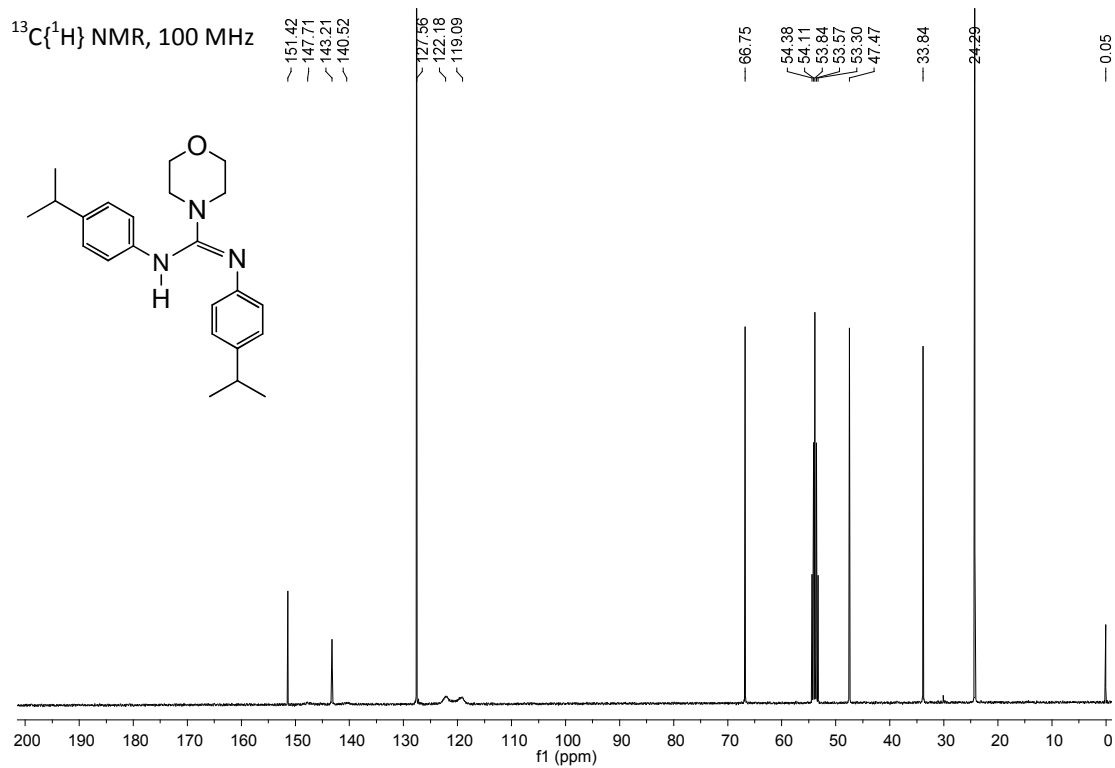

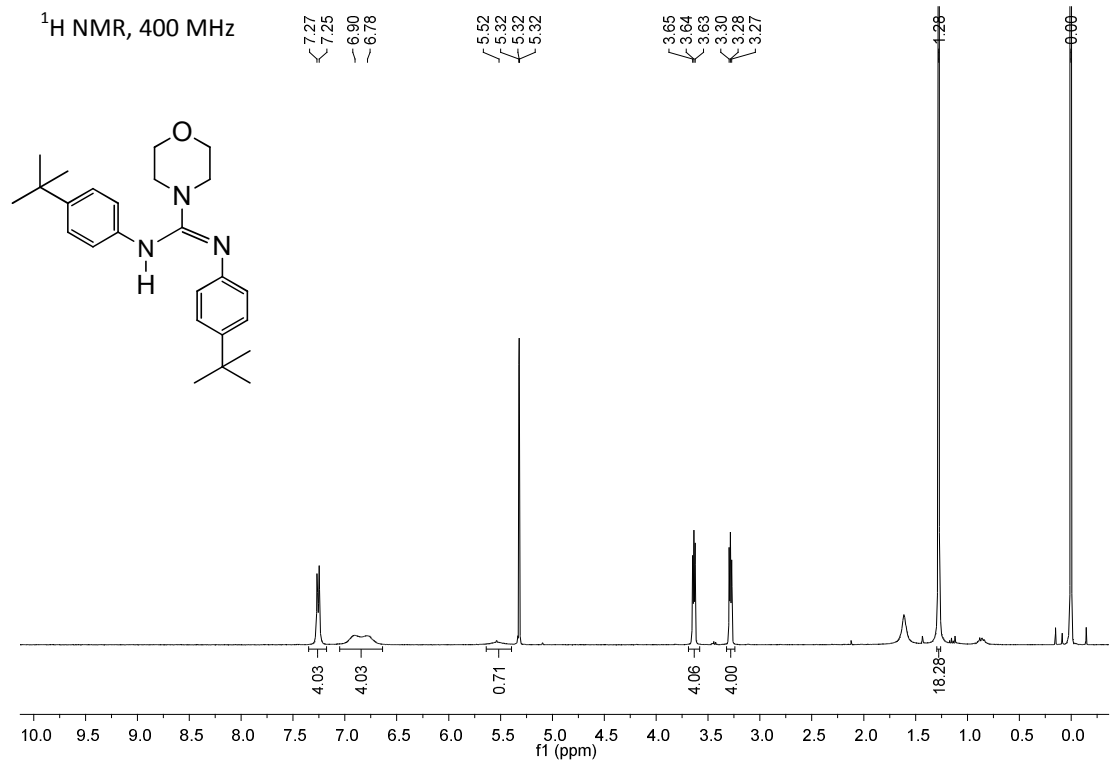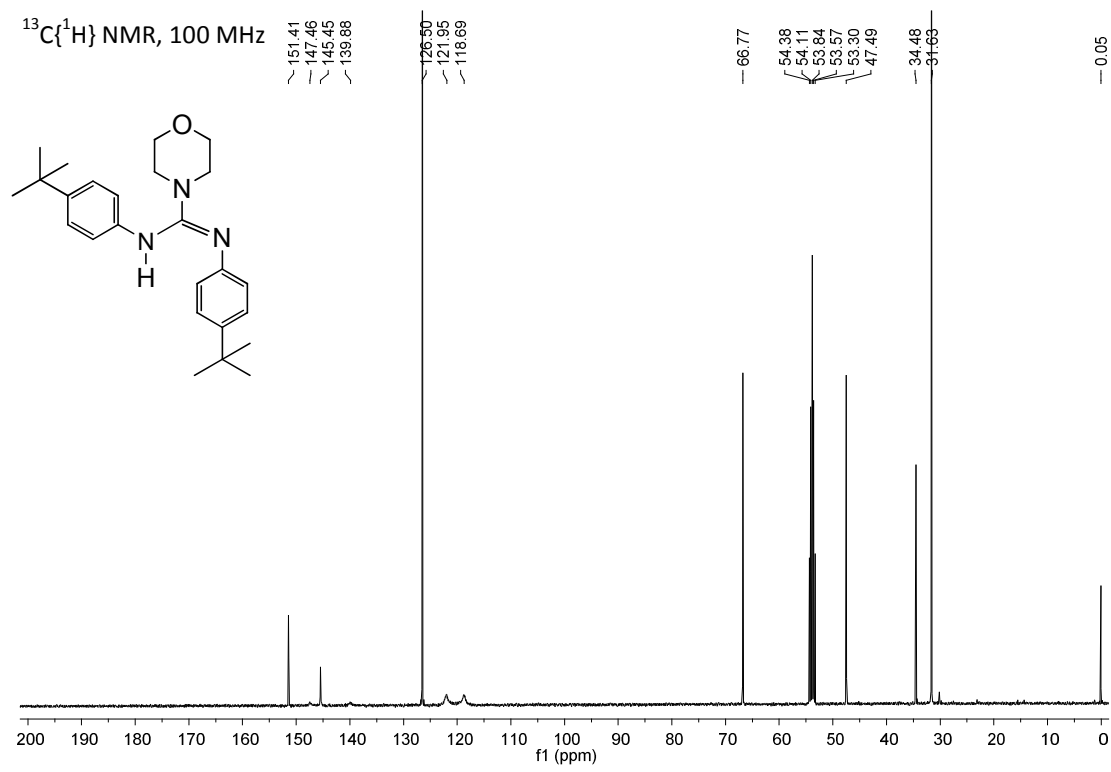

$^1\text{H}$  NMR, 400 MHz

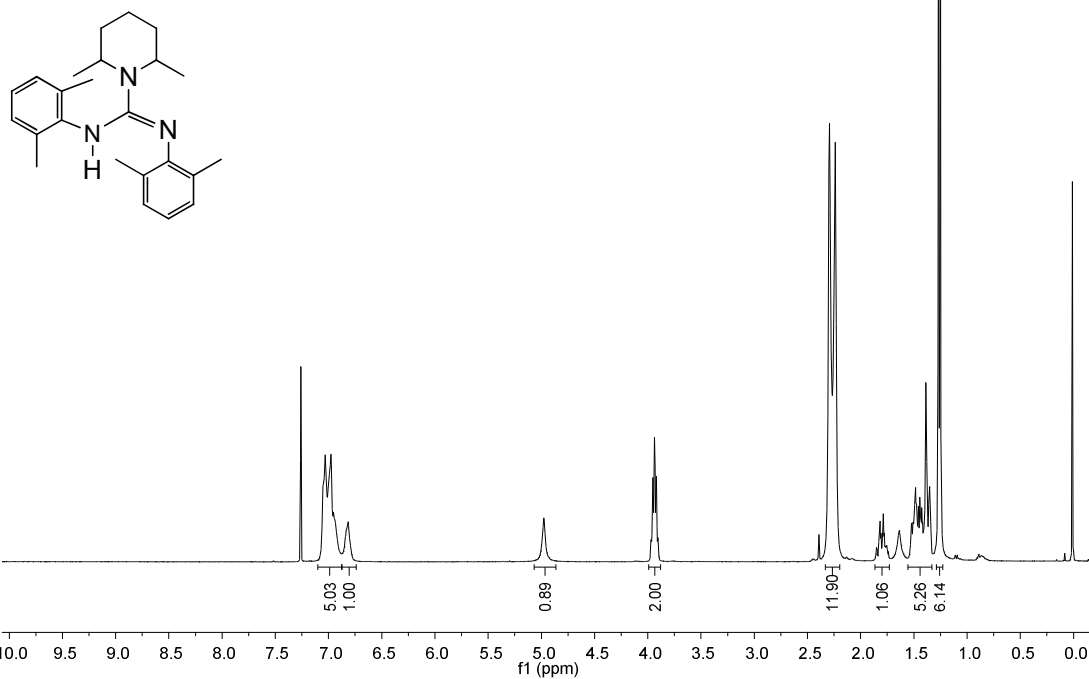

$^{13}\text{C}\{^1\text{H}\}$  NMR, 100 MHz

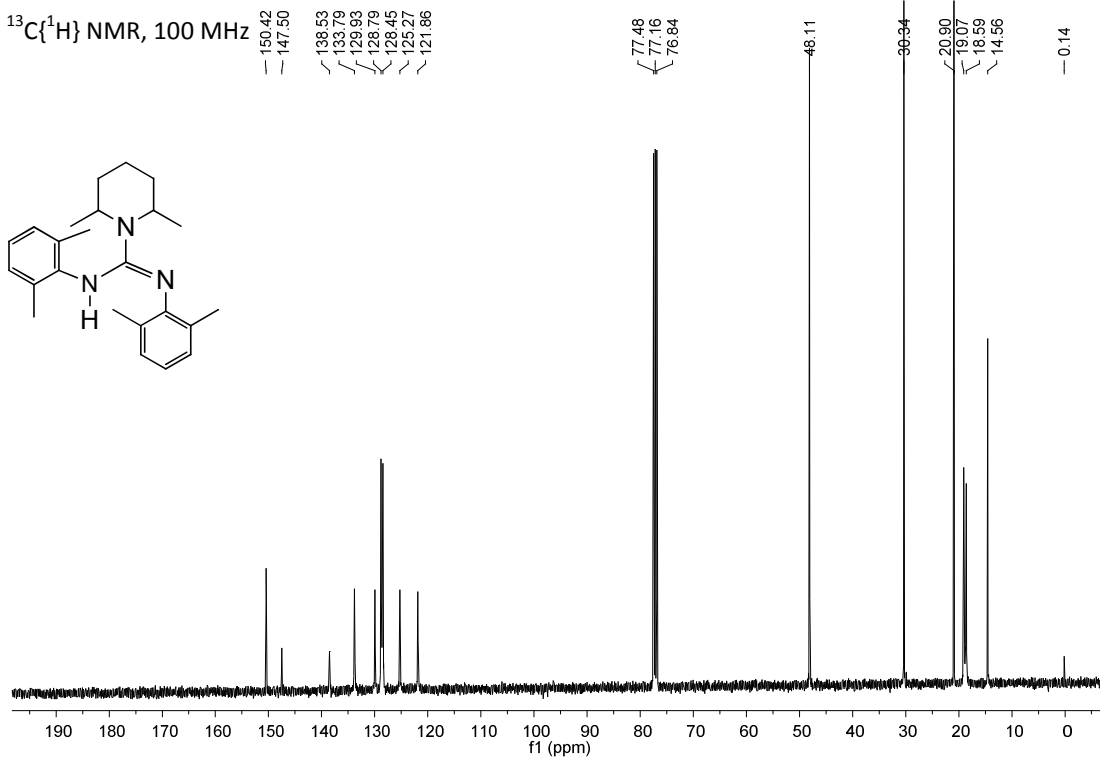

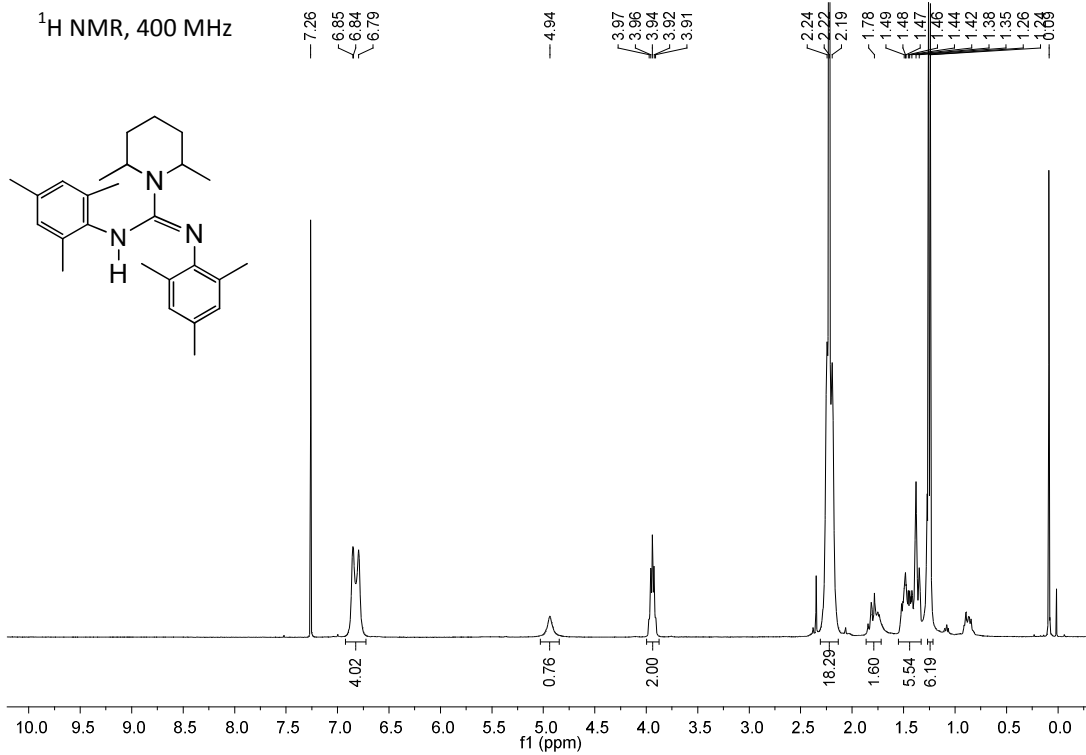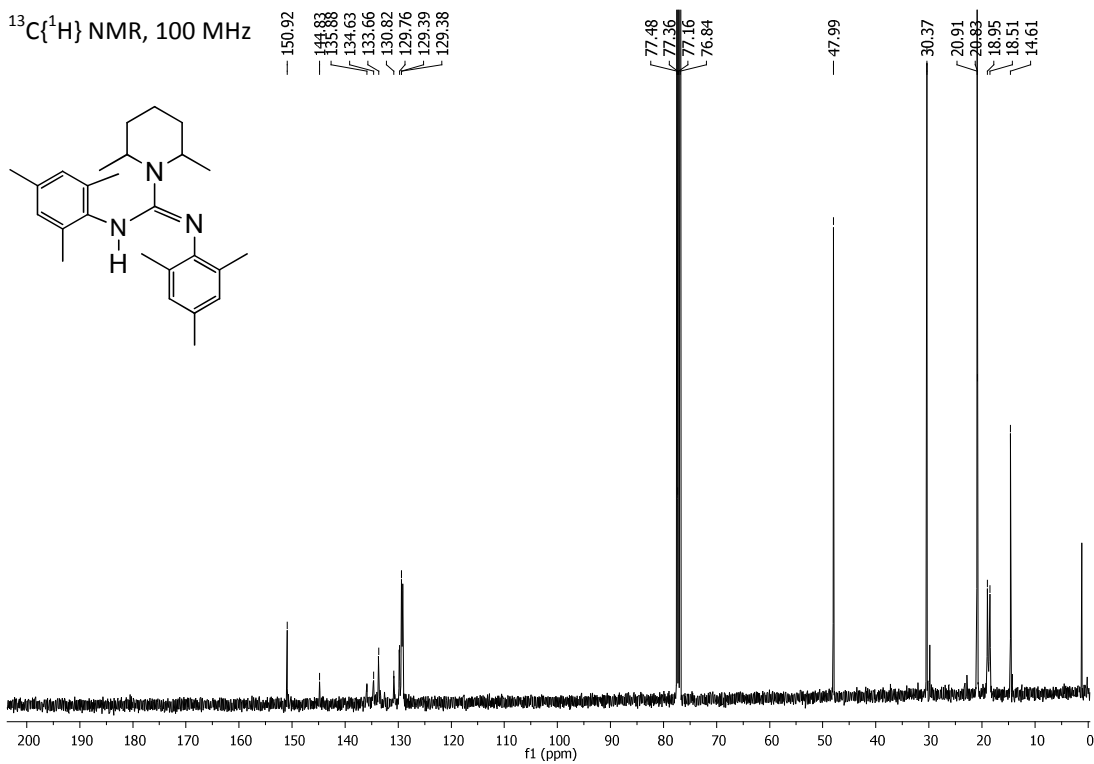

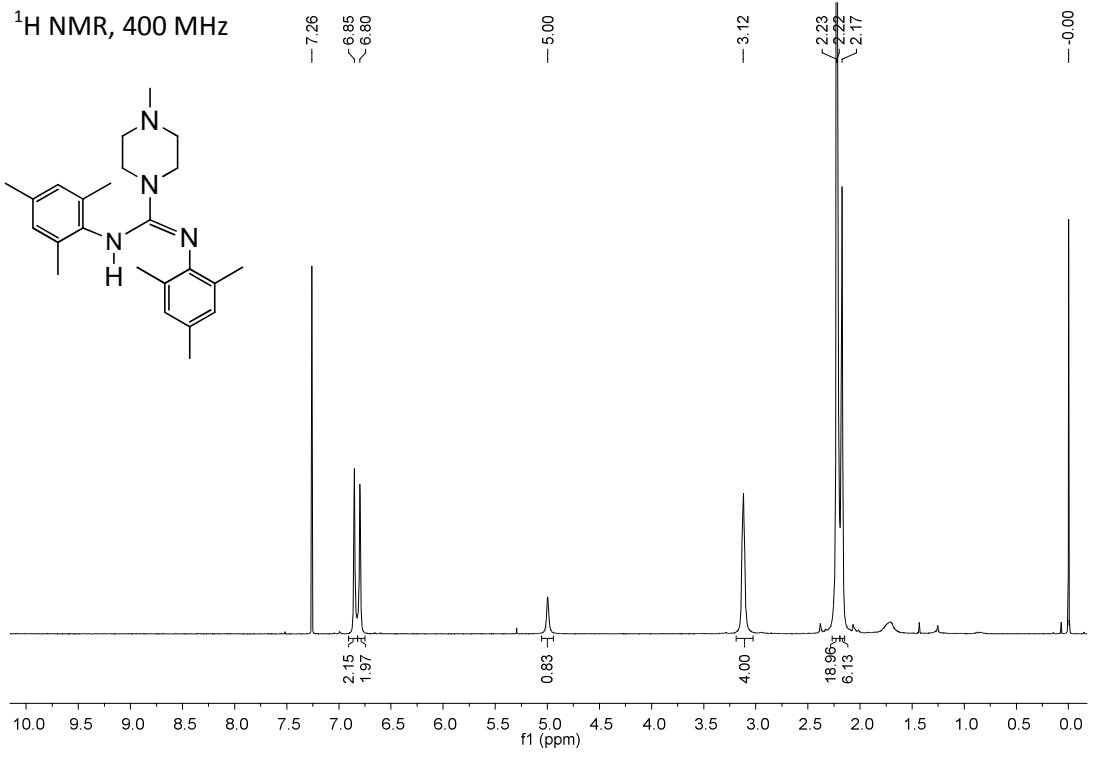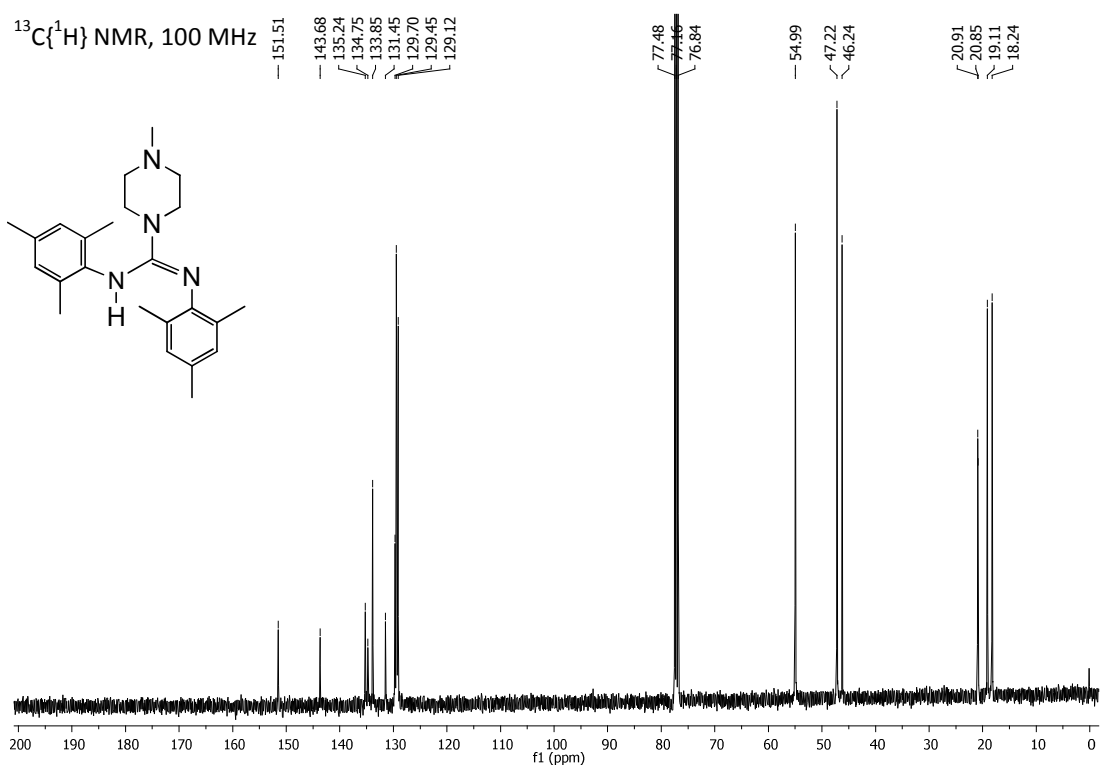



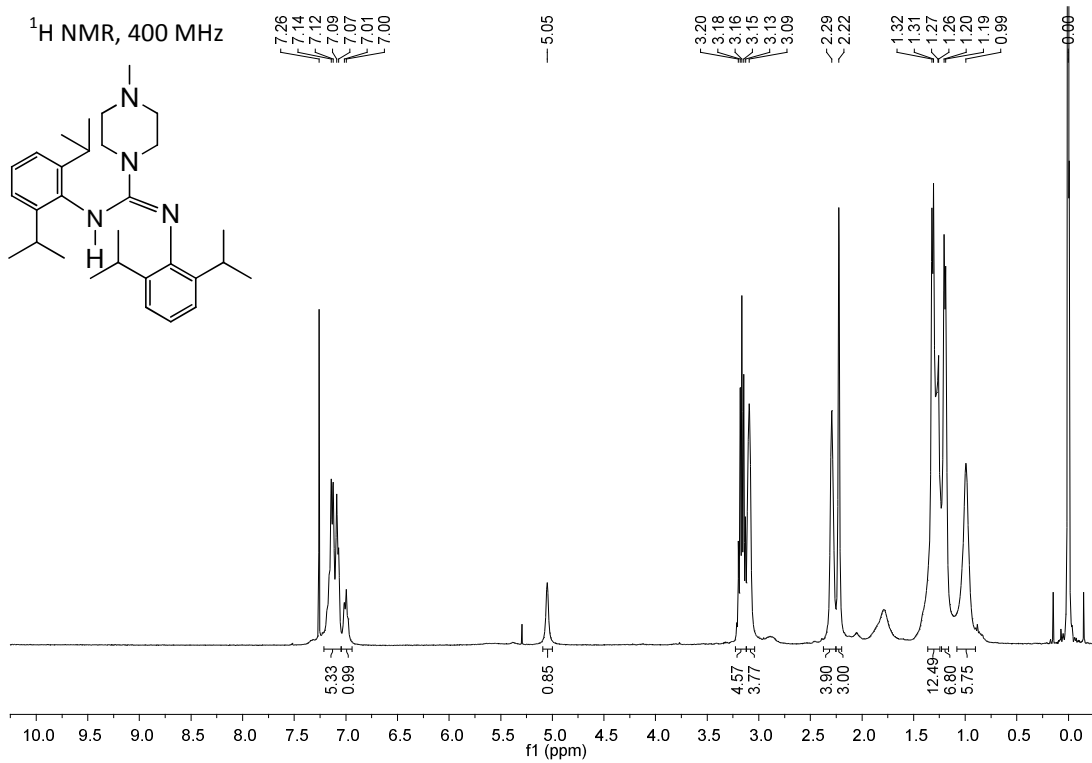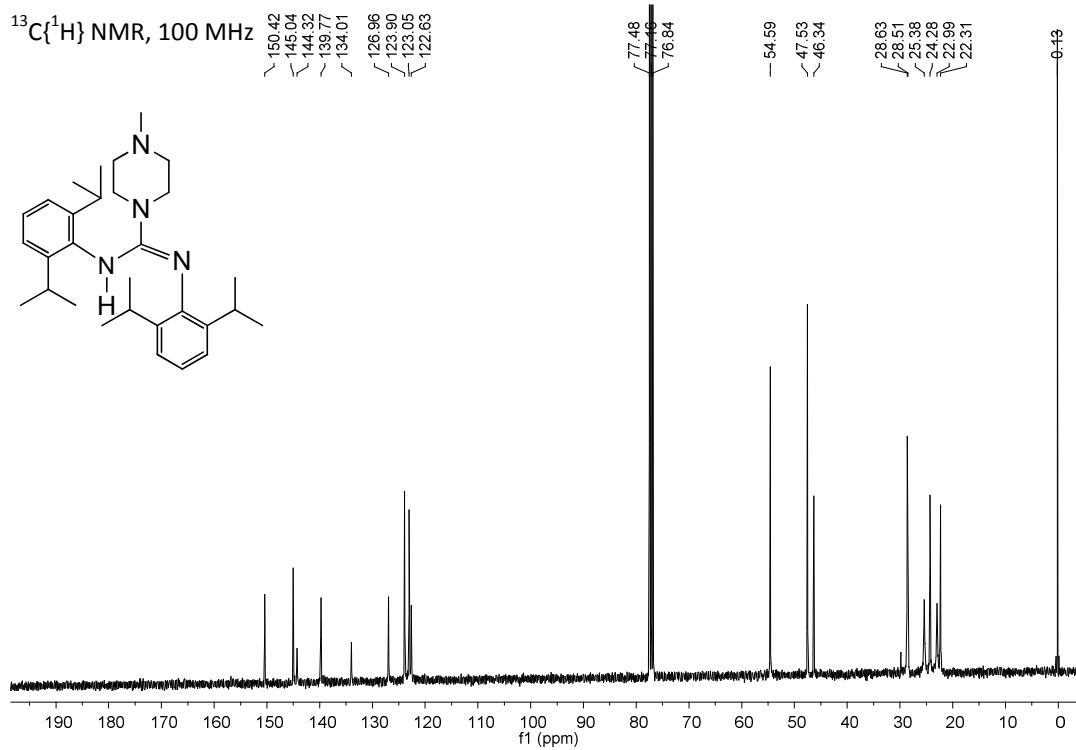

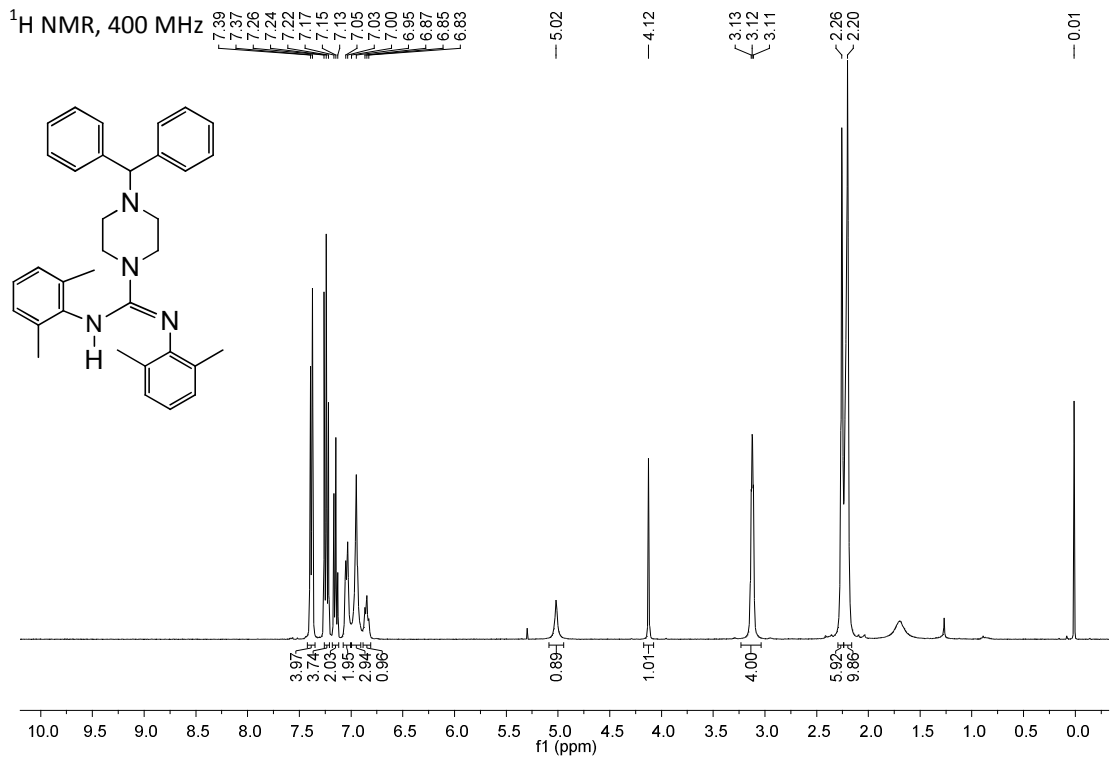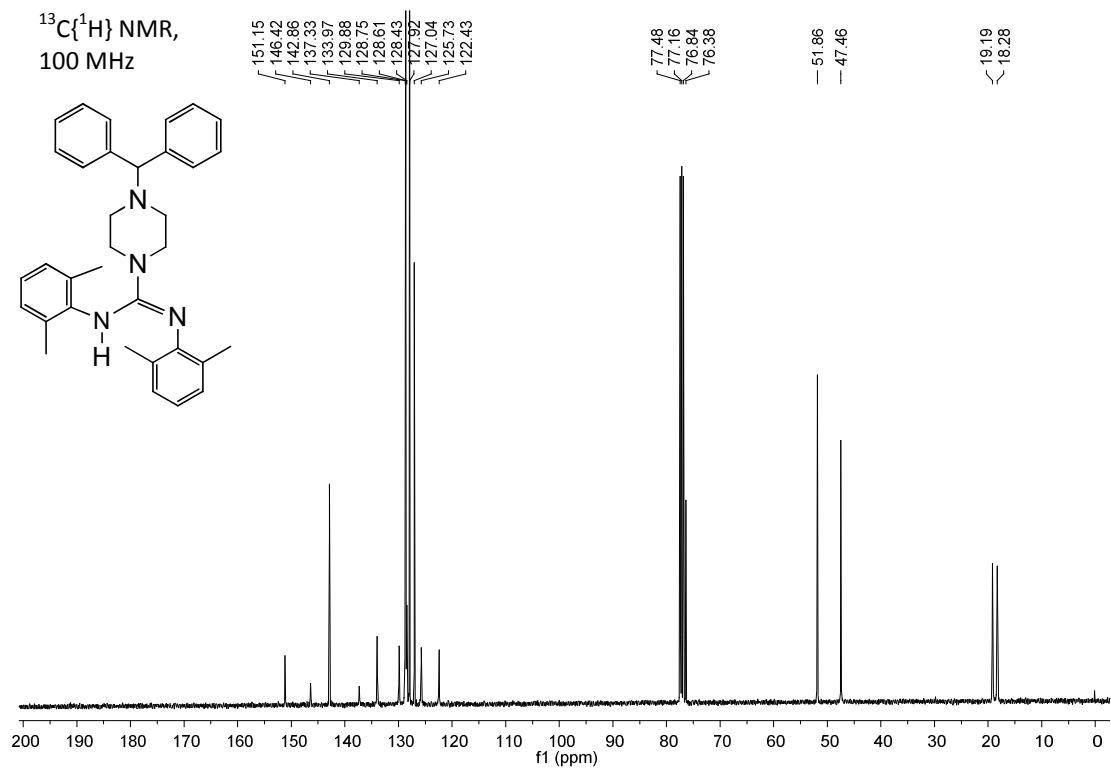

<sup>1</sup>H NMR,  
400 MHz

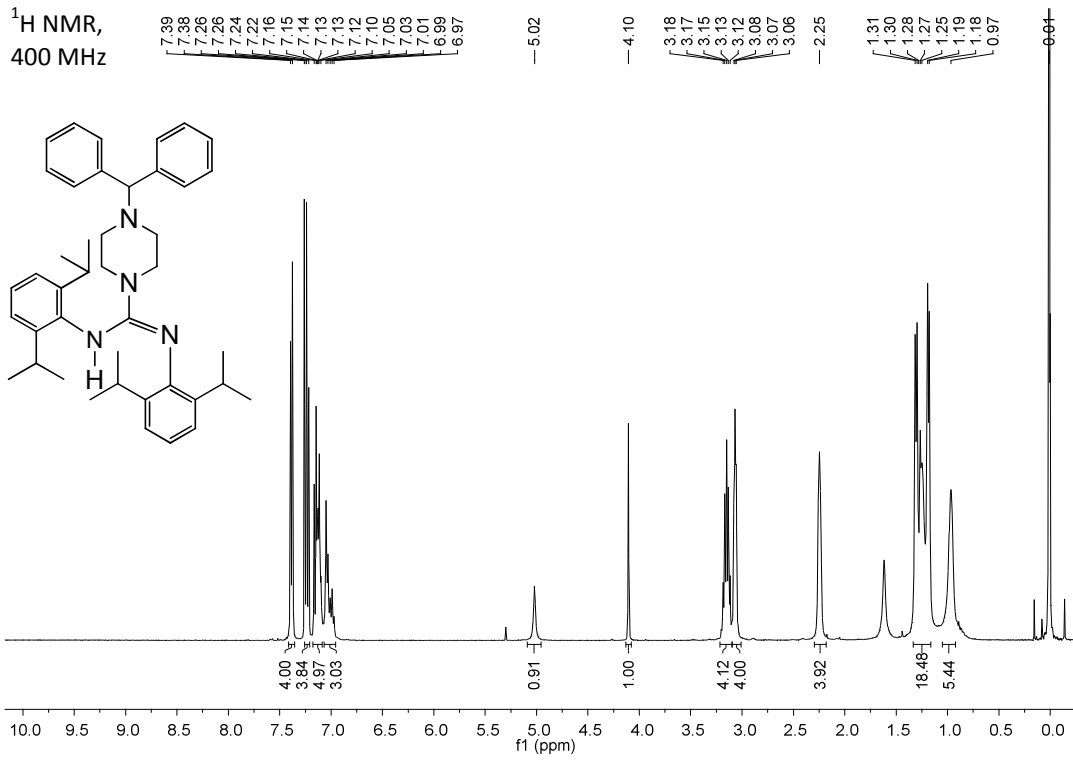

<sup>13</sup>C{<sup>1</sup>H} NMR,  
100 MHz

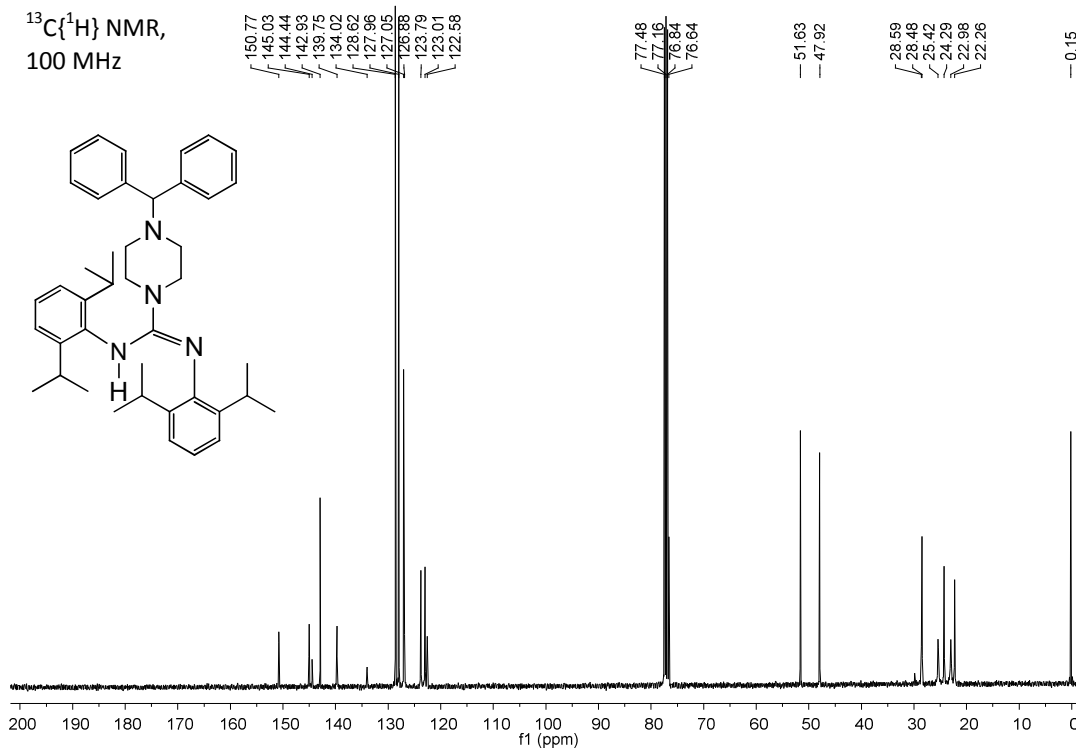

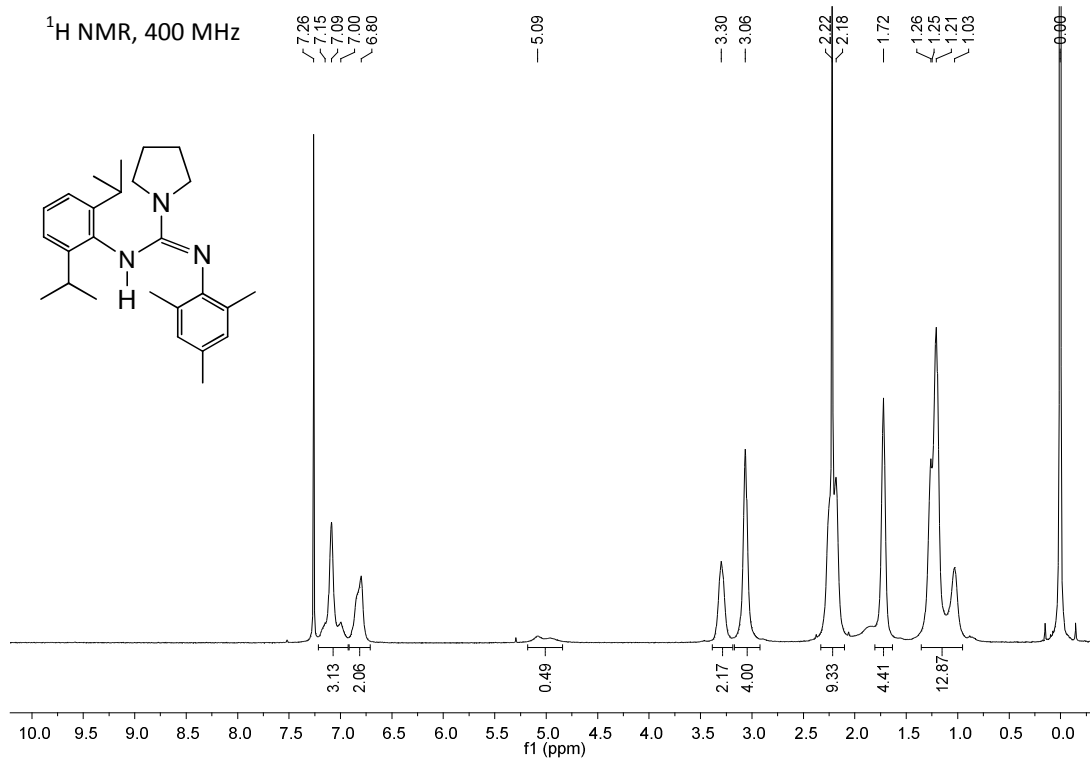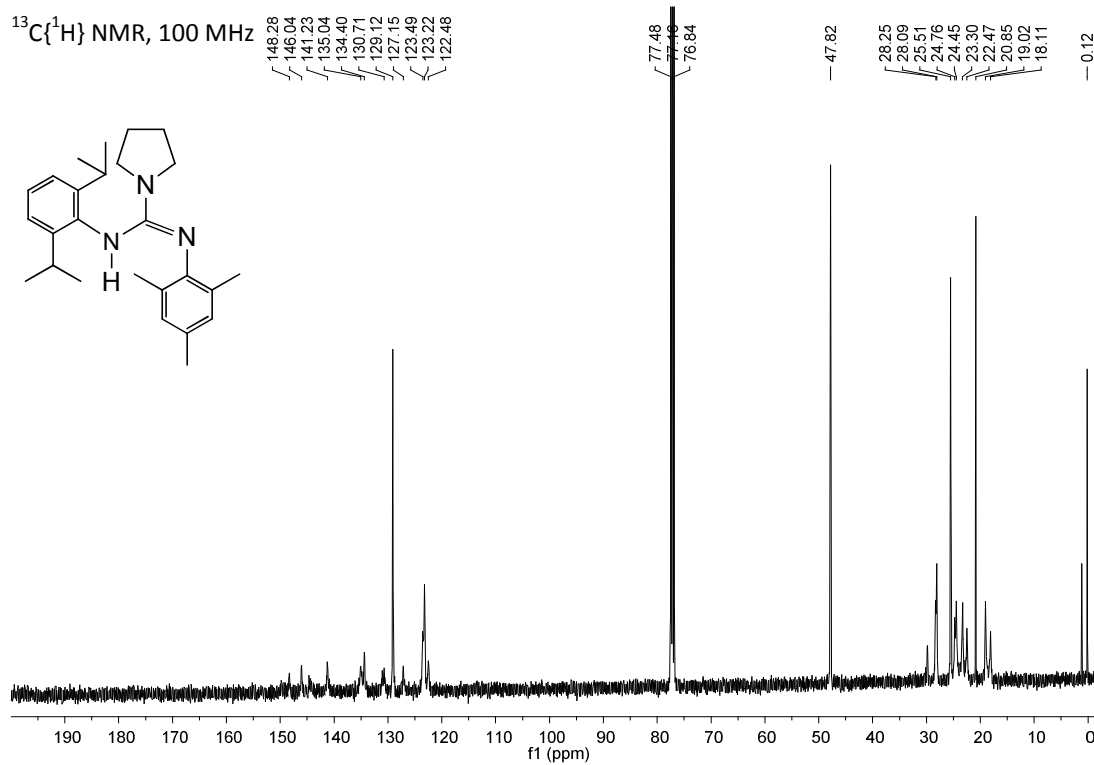

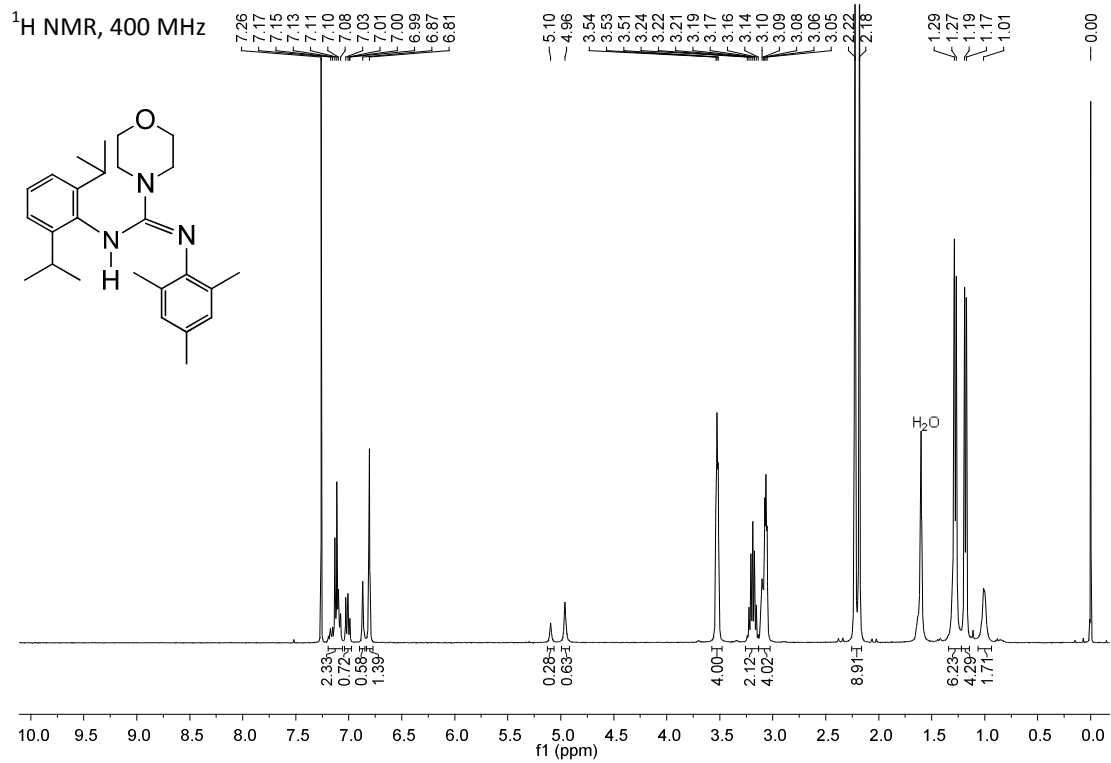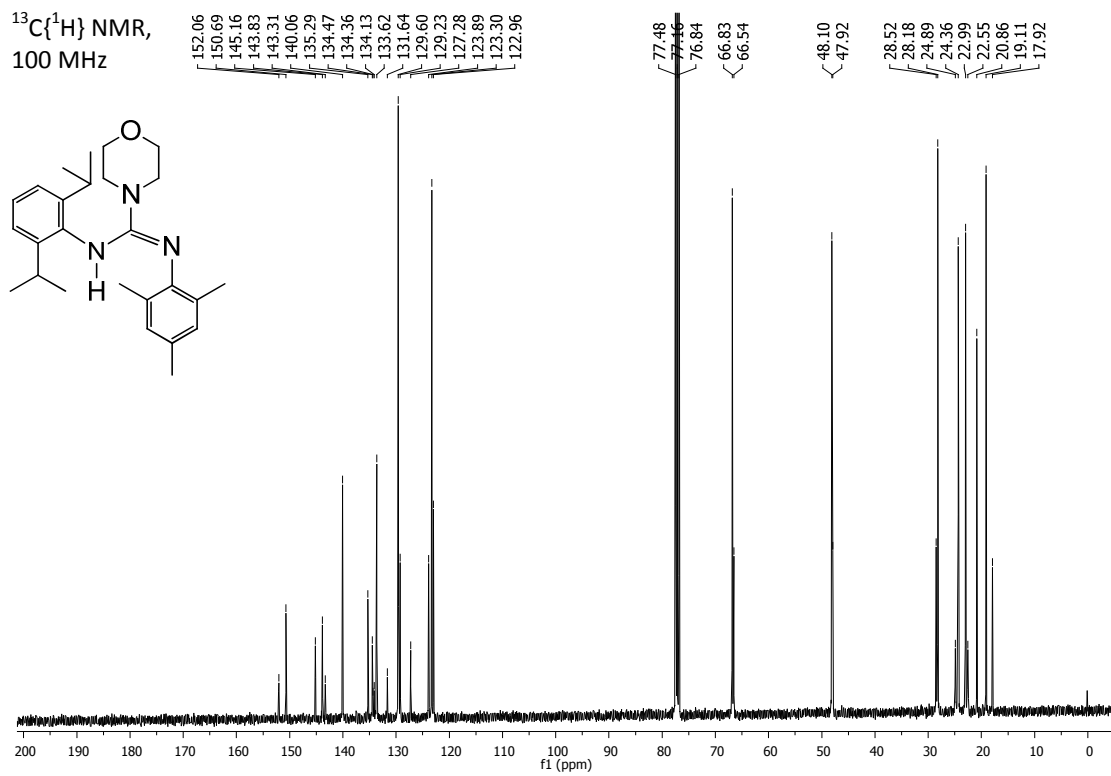

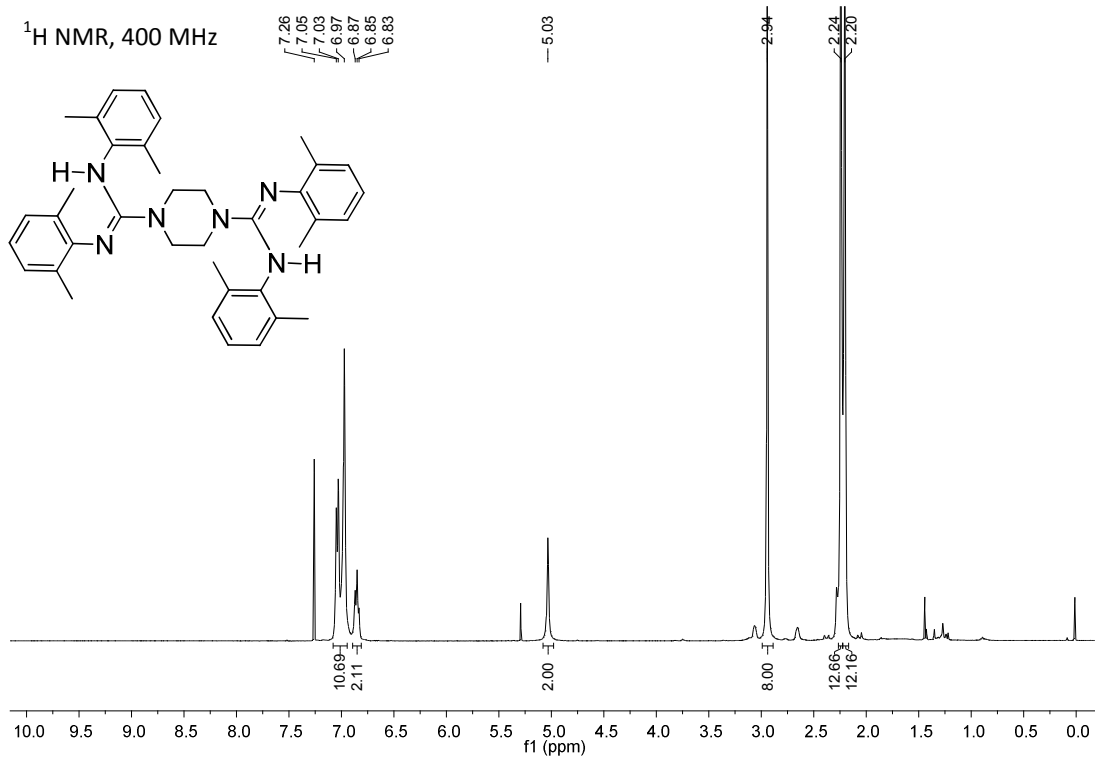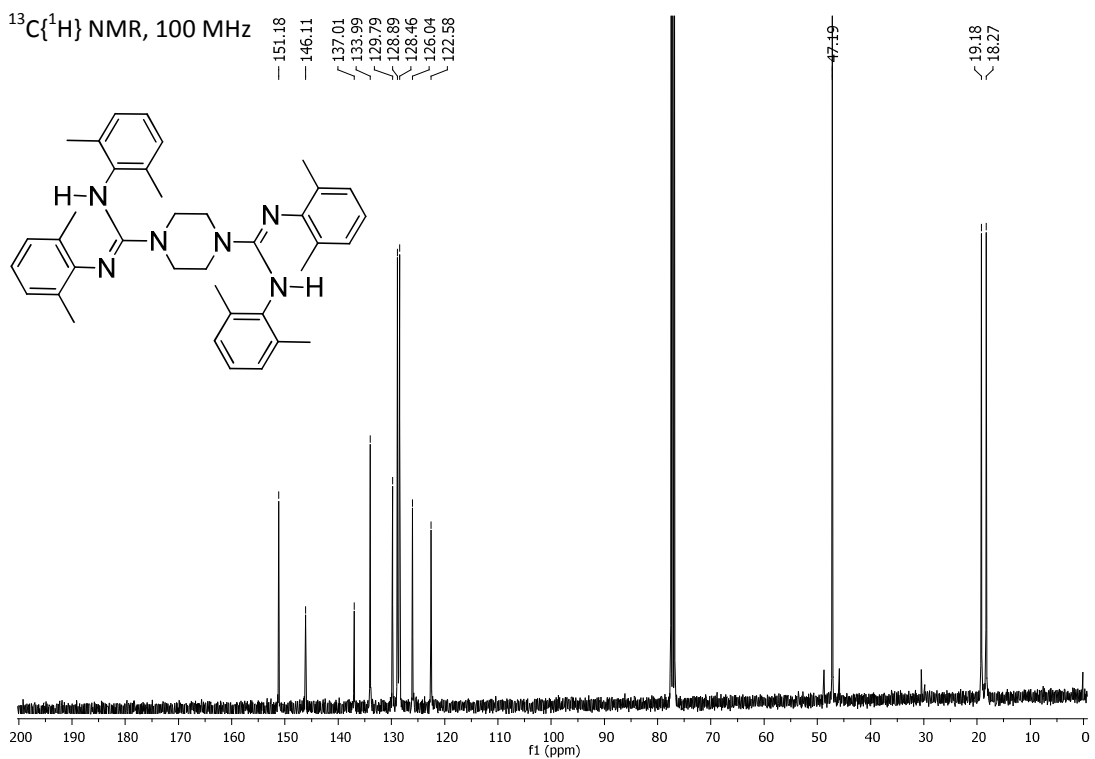

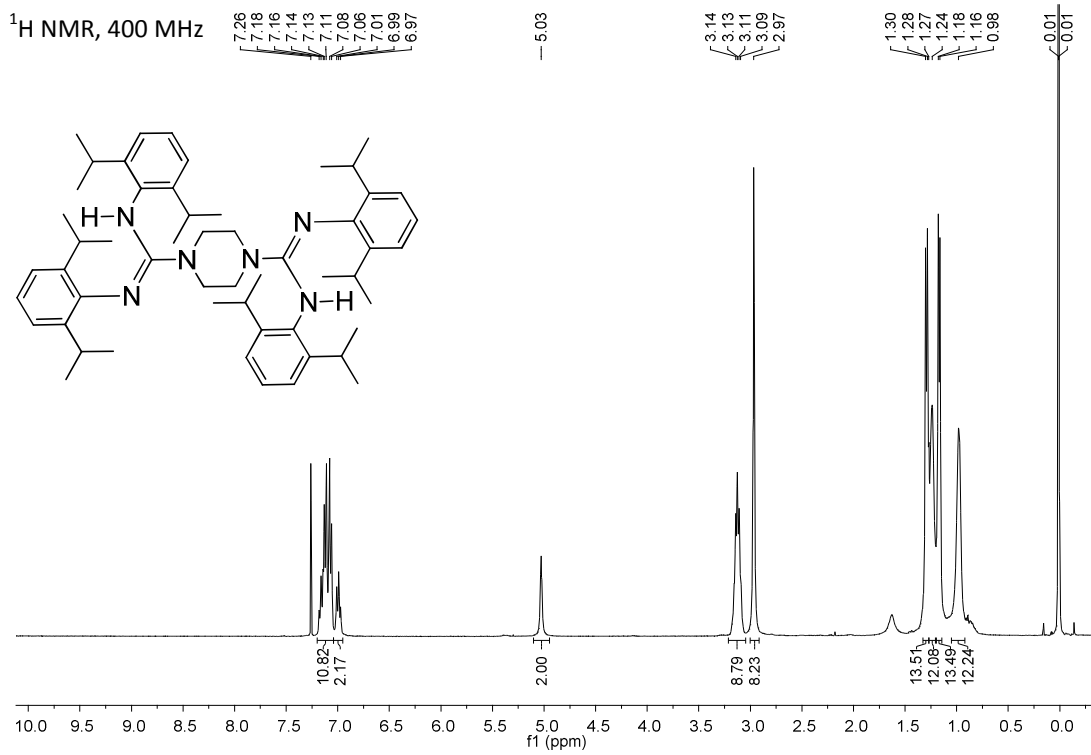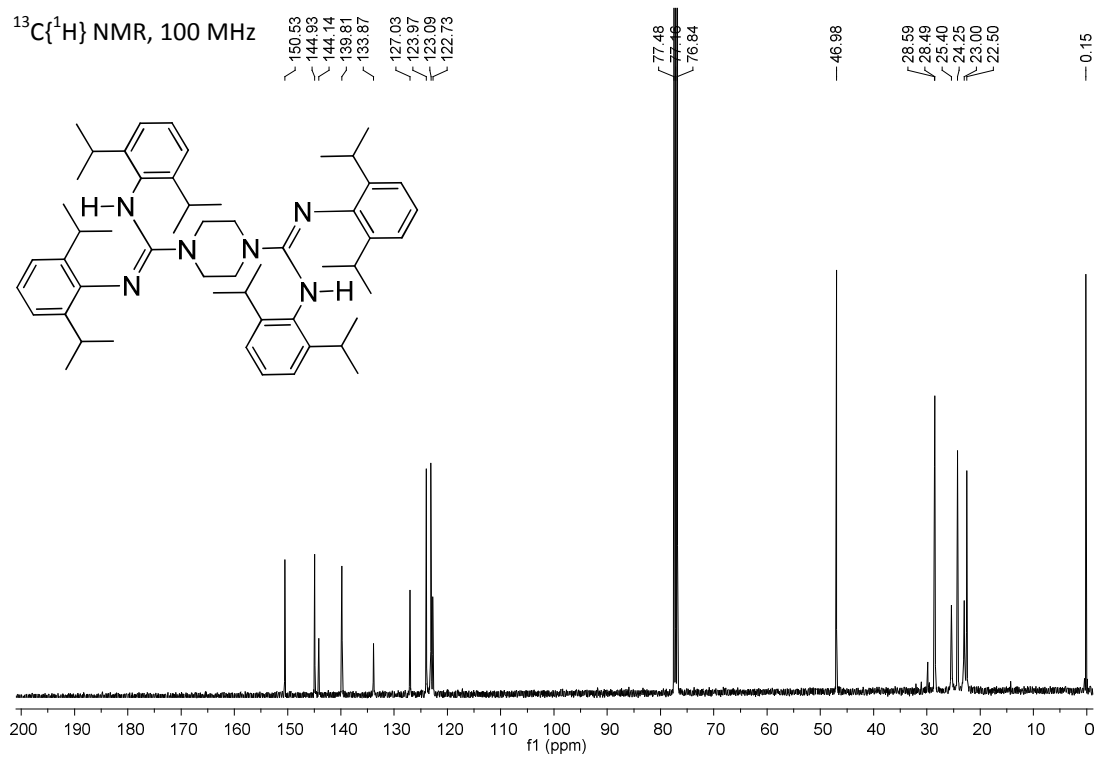

**Table S2. Crystal data and structural refinement of compounds 1a, 21a, & 27a,**

|                                                | <b>1a</b>                                                                                   | <b>22a</b>                                                                       | <b>27a</b>                                                                         |
|------------------------------------------------|---------------------------------------------------------------------------------------------|----------------------------------------------------------------------------------|------------------------------------------------------------------------------------|
| Empirical formula                              | C <sub>21</sub> H <sub>27</sub> N <sub>3</sub>                                              | C <sub>30</sub> H <sub>46</sub> N <sub>4</sub>                                   | C <sub>38</sub> H <sub>46</sub> N <sub>6</sub>                                     |
| CCDC                                           | 1400660                                                                                     | 1400662                                                                          | 1400661                                                                            |
| Formula weight                                 | 321.46                                                                                      | 462.71                                                                           | 586.81                                                                             |
| Temperature, K                                 | 296(2)                                                                                      | 296(2)                                                                           | 296(2)                                                                             |
| Wavelength, Å                                  | 0.71073                                                                                     | 0.71073                                                                          | 0.71073                                                                            |
| Crystal system                                 | Triclinic                                                                                   | Monoclinic                                                                       | Monoclinic                                                                         |
| Space group                                    | P-1                                                                                         | P2(1)/c                                                                          | C2/c                                                                               |
| Unit cell dimensions, Å & °                    | a = 8.443(2) α = 69.409(10)<br>b = 10.304(2) β = 81.907(10)<br>c = 12.134(2) γ = 77.454(10) | a = 9.405(2) α = 90.000<br>b = 17.120(3) β = 102.705<br>c = 18.715(3) γ = 90.000 | a = 18.0078(7) α = 90<br>b = 13.9272(7) β =<br>113.869(4)<br>c = 15.5355(7) γ = 90 |
| Volume, Å <sup>3</sup>                         | 962.2(8)                                                                                    | 2939.6(19)                                                                       | 3563.0(3)                                                                          |
| Z                                              | 2                                                                                           | 4                                                                                | 4                                                                                  |
| Density (calculated), Mg/m <sup>3</sup>        | 1.110                                                                                       | 1.046                                                                            | 1.094                                                                              |
| Absorption coefficient, mm <sup>-1</sup>       | 0.066                                                                                       | 0.062                                                                            | 0.065                                                                              |
| F(000)                                         | 348                                                                                         | 1016                                                                             | 1264                                                                               |
| Crystal size, mm <sup>3</sup>                  | 0.18 x 0.12 x 0.098                                                                         | 0.12 x 0.097 x 0.089                                                             | 0.22 x 0.16 x 0.10                                                                 |
| Theta range for data collection, °             | 2.96 to 25.50                                                                               | 2.22 to 25.50                                                                    | 2.68 to 27.76                                                                      |
| Index ranges                                   | -10 ≤ h ≤ 10, -12 ≤ k ≤ 12,<br>-14 ≤ l ≤ 14                                                 | -11 ≤ h ≤ 11,<br>-20 ≤ k ≤ 20, -22 ≤ l ≤ 22                                      | -23 ≤ h ≤ 23, -18 ≤ k ≤ 18,<br>-18 ≤ l ≤ 20                                        |
| Reflections collected                          | 13541                                                                                       | 42851                                                                            | 25181                                                                              |
| Independent reflections                        | 3582 [R(int) = 0.0280]                                                                      | 5475 [R(int) = 0.0382]                                                           | 4188 [R(int) = 0.0542]                                                             |
| Completeness to theta = 25.50°                 | 99.8 %                                                                                      | 99.9 %                                                                           | 99.7 %                                                                             |
| Absorption correction                          | Empirical                                                                                   | Empirical                                                                        | Empirical                                                                          |
| Max. and min. transmission                     | 0.7461 and 0.7010                                                                           | 0.7461 and 0.6946                                                                | 0.7456 and 0.7002                                                                  |
| Refinement method                              | Full-matrix least-squares on F <sup>2</sup>                                                 | Full-matrix least-squares on F <sup>2</sup>                                      | Full-matrix least-squares on F <sup>2</sup>                                        |
| Data / restraints / parameters                 | 3582 / 0 / 225                                                                              | 5475 / 0 / 320                                                                   | 4188 / 6 / 203                                                                     |
| Goodness-of-fit on F <sup>2</sup>              | 1.041                                                                                       | 1.052                                                                            | 1.039                                                                              |
| Final R indices [I > 2σ(I)]                    | R1 = 0.0587, wR2 = 0.1640                                                                   | R1 = 0.0549, wR2 = 0.1445                                                        | R1 = 0.0513, wR2 = 0.1291                                                          |
| R indices (all data)                           | R1 = 0.0810, wR2 = 0.1838                                                                   | R1 = 0.0724, wR2 = 0.1691                                                        | R1 = 0.0885, wR2 = 0.1504                                                          |
| Largest diff. peak and hole, e.Å <sup>-3</sup> | 0.369 and -0.206                                                                            | 0.283 and -0.369                                                                 | 0.156 and -0.179                                                                   |



**Table S3. Selected bond lengths (Å) and bond angles (°) of compound 1a, 22a & 27a,**

| <b>1a</b>       |            | <b>22a</b>      |            | <b>27a</b>      |            |
|-----------------|------------|-----------------|------------|-----------------|------------|
| N–H             | 0.800      | N–H             | 0.831      | N–H             | 0.860      |
| N(1)–C(1)       | 1.288(2)   | N(1)–C(1)       | 1.2810(19) | C(2)–N(4)       | 1.3966(18) |
| N(2)–C(1)       | 1.365(2)   | N(2)–C(1)       | 1.3805(19) | C(2)–N(6)       | 1.2734(18) |
| N(3)–C(1)       | 1.364(2)   | N(3)–C(1)       | 1.3941(19) | C(2)–N(5)       | 1.3705(18) |
| N(1)–C(2)       | 1.397(3)   | N(1)–C(2)       | 1.416(2)   | C(22)–N(5)      | 1.4336(19) |
| N(2)–C(10)      | 1.431(2)   | N(2)–C(14)      | 1.4370(19) | C(27)–N(6)      | 1.417(2)   |
| N(1)–C(1)–N(2)  | 123.60(17) | N(1)–C(1)–N(2)  | 125.02(13) | N(6)–C(2)–N(5)  | 124.92(13) |
| N(1)–C(1)–N(3)  | 118.75(17) | N(1)–C(1)–N(3)  | 119.43(13) | N(6)–C(2)–N(4)  | 119.84(13) |
| N(3)–C(1)–N(2)  | 117.65(16) | N(3)–C(1)–N(2)  | 115.54(13) | N(5)–C(2)–N(4)  | 115.23(12) |
| C(1)–N(2)–C(10) | 128.37(17) | C(1)–N(2)–C(14) | 126.52(13) | C(2)–N(5)–C(22) | 126.62(12) |
| C(1)–N(1)–C(2)  | 122.71(17) | C(1)–N(1)–C(2)  | 121.83(12) | C(2)–N(6)–C(27) | 121.23(13) |
